# Plant Genotype Influences Physicochemical Properties of Substrate as well as Bacterial and Fungal Assemblages in the Rhizosphere of Balsam Poplar

1 **Karelle Rheault<sup>1</sup>, Denis Lachance<sup>1</sup>, Marie-Josée Morency<sup>1</sup>, Évelyne Thiffault<sup>2</sup>, Marie**  
2 **Guittonny<sup>3</sup>, Nathalie Isabel<sup>1</sup>, Christine Martineau<sup>1</sup> and Armand Séguin<sup>1\*</sup>**

3 <sup>1</sup> Natural Resources Canada, Canadian Forest Service, Laurentian Forestry Centre, Quebec City, QC,  
4 Canada

5 <sup>2</sup> Research Centre on Renewable Materials, Department of Wood and Forest Sciences, Université  
6 Laval, Quebec City, QC, Canada

7 <sup>3</sup> Research Institute of Mining and Environment (RIME), Université du Québec en Abitibi-  
8 Témiscamingue, Rouyn-Noranda, QC, Canada

9 **\* Correspondence:**

10 Armand Séguin

11 armand.seguin@canada.ca

12 **Keywords:** *Populus balsamifera*, Genotype-by-environment interactions, Microbiome, Tree  
13 genetics, Mine waste revegetation, Plant-microbe interactions.

## 14 Abstract

15 Abandoned unrestored mines are an important environmental issue since they typically remain  
16 unvegetated for decades, exposing vast amounts of mine waste to erosion. Several factors limit the  
17 revegetation of these sites, including extreme abiotic conditions and unfavorable biotic conditions.  
18 However, some pioneer tree species having high level of genetic diversity, such as balsam poplar  
19 (*Populus balsamifera*), are able to naturally colonize these sites and initiate plant succession. This  
20 suggests that some tree genotypes are likely more suited for acclimation to the conditions of mine  
21 wastes. In this study, two contrasting mine waste storage facilities (waste rock versus tailings) from  
22 the Abitibi region of Quebec (Canada), on which poplars have grown naturally, were selected. First,  
23 we assessed *in situ* the impact of vegetation presence on each type of mine wastes. The presence of  
24 balsam poplars improved soil health locally by improving physicochemical properties (e.g. higher  
25 nutrient content and pH) of the mine wastes and causing an important shift in their bacterial and  
26 fungal community compositions, going from lithotrophic communities that dominate mine waste  
27 environments to heterotrophic communities involved in nutrient cycling. Next, in a greenhouse  
28 experiment, ten genotypes of *P. balsamifera* collected on both mine sites and from a natural forest  
29 nearby were grown in these mine wastes. Tree growth was monitored during two growing seasons,  
30 after which the effect of genotype-by-environment interactions was assessed by measuring the  
31 physicochemical properties of the substrates and the changes in microbial communities, using a  
32 metabarcoding approach. Although substrate type was identified as the main driver of rhizosphere  
33 microbiome diversity and community structure, a significant effect of tree genotype was also  
34 detected, particularly for bacterial communities. Plant genotype also influenced aboveground tree  
35 growth and the physicochemical properties of the substrates. These results highlight the influence of

36 balsam poplar genotype on the soil environment and the potential importance of tree genotype  
37 selection in the context of mine waste revegetation.

38 Word count: 9031 words

39 Number of figures and tables: 6 figures and 6 supplementary figures; 2 tables and 11 supplementary  
40 tables.

## 41 **1 Introduction**

42 Abandoned and unrestored mine sites represent an important environmental issue since they typically  
43 remain unvegetated for decades. They often constitute a major eyesore to adjacent communities and  
44 pose further risk to surrounding ecosystems as vast amounts of soil, waste rock and tailings are  
45 exposed to aeolian and water erosion (Mendez and Maier, 2008). Soil microorganisms are in part  
46 responsible for the negative impacts of mine sites, mainly through the formation of acid mine  
47 drainage, mostly at pH lower than five (Bussière *et al.*, 2005). In addition, the nature and  
48 composition of mine wastes make them challenging substrates for plant growth: they are nutrient  
49 poor, have either a very low or very high pH and have poor physical structure and deficient water  
50 holding capacity (Kumaresan *et al.*, 2017).

51 Revegetation could help initiate the restoration of these ecosystems. Established plants, together with  
52 their associated microbiome, have the ability to reduce acid mine drainage and modify the  
53 physicochemical properties of their environment, improving soil quality and fertility (Hubbard *et al.*,  
54 2018). Furthermore, plants form a biological cap that reduces soil erosion while increasing water  
55 retention and organic matter content in coarse mine wastes, which contributes to soil stability  
56 (Tordoff *et al.*, 2000).

57 Parameters used to assess the success of revegetation are based on plant, soil and microbial criteria.  
58 Plant criteria include plant survival and biomass, leaf and shoot metal concentrations, establishment  
59 of other native colonizers and ability to self-propagate (Tordoff *et al.*, 2000). Soil criteria include  
60 improvement in soil structure such as increased soil aggregation and reduced erosion; and  
61 improvement in soil physicochemical properties such as less acidic pH, increased organic matter  
62 content and increased metal bioavailability and mobility (Mendez and Maier, 2008; Lauber *et al.*,  
63 2009). Although currently not widely used, microbial criteria include a decrease in autotrophic  
64 bacteria followed by an increase in heterotrophic bacteria and fungi (Rosario *et al.*, 2007) and an  
65 increase in bacterial diversity and richness (Garbeva *et al.*, 2004).

66 The efficiency of revegetation is largely dependent on the establishment of a large root network and  
67 beneficial root-soil microbe interactions (Callender *et al.*, 2016). Poplars with their high level of  
68 genetic diversity could thus be ideal candidates for revegetation purposes. Indeed, poplars are pioneer  
69 trees: they rapidly grow in a vast range of environmental conditions and they easily propagate by root  
70 suckering and crown breakage (Dickmann and Kuzovkina, 2014). They also have a large and deep  
71 root system (Braatne *et al.*, 1996). As a perennial species, they can tolerate harsh environments and  
72 promote the establishment of primary and successive plant species through the addition of soil  
73 nutrients from their abundant litter production, increasing ecosystem health and function (Pardon *et al.*,  
74 2017). They can establish root associations with both arbuscular mycorrhizal and  
75 ectomycorrhizal fungi (Gehring *et al.*, 2006), as well as other endophytic and rhizospheric organisms,  
76 thereby increasing access to nutrients, relieving abiotic stresses such as hydric stress, suppressing  
77 plant pathogens, altering phenology and promoting plant growth (Bulgarelli *et al.*, 2013). Finally,  
78 *Populus* is considered as a model genus for the study of woody perennials and therefore massive

79 genomic resources are available (e.g. fully sequenced genome, Tuskan *et al.*, 2006) which provides  
80 unique opportunity to support selection of most suited genotypes to address ecosystem restoration  
81 issues (Fini *et al.*, 2017).

82 Plant species produce specific root exudates that will attract specific microorganisms, resulting in  
83 dissimilar selective pressures on microbial communities (Philippot *et al.*, 2013). In addition,  
84 differences between plant genotypes can have a significant impact on the microbiomes of their  
85 rhizosphere (Badri *et al.*, 2009; Lebeis *et al.*, 2015; Veach *et al.*, 2019). This suggests that plant  
86 genotype could significantly affect the recruitment of specific microorganisms, thus leading to further  
87 differences in plant growth and ecosystem functioning. Many studies have attempted to characterize  
88 the root microbiome of *Populus*. It has been shown that soil type is the main driver of microbial  
89 community assembly, since physicochemical properties, such as granulometry, pH and nutrient  
90 content, influence microbial composition and functional group prevalence (Gottel *et al.*, 2011;  
91 Danielsen *et al.*, 2012; Shakya *et al.*, 2013; Cregger *et al.*, 2018). However, genetic variations of the  
92 host plant are also associated with differential microbial colonization (Bonito *et al.*, 2014).  
93 Differentiating between the effects of soil properties and those of the host plant genotype has not yet  
94 been sufficiently addressed (Bonito *et al.*, 2019).

95 The aim of this study was to assess the suitability of *P. balsamifera* for the revegetation of abandoned  
96 mine sites and to determine the impact of genotype-by-environment interactions on the improvement  
97 of soil health and the rhizosphere microbiome. To do so, two contrasting mine sites from Abitibi,  
98 Quebec, where poplars have naturally grown, were selected. First, in a field study, the impact of  
99 balsam poplar presence on the waste rock of the first site and on tailings of the second site, was  
100 assessed, regarding their physicochemical properties and the composition of their microbiome using  
101 a metabarcoding approach. Then, in a greenhouse experiment, ten genotypes of *P. balsamifera*  
102 collected from both mine sites and from a natural forest nearby were grown in mine wastes (waste  
103 rock and tailings) and evaluated. Tree growth was monitored over two growing seasons, after which  
104 the effect of genotype-by-environment interactions on microbial community dynamics were  
105 investigated using the same genomic tools as for the field study. The main objectives were (1) to  
106 assess the effect of vegetation presence on two contrasting mine wastes by measuring  
107 physicochemical properties and characterizing bacterial and fungal communities of the mine wastes  
108 *in situ*; (2) to assess the effect of balsam poplar genotype on the physicochemical properties of their  
109 substrate and the diversity and composition of their rhizosphere microbiome; and (3) to assess the  
110 effect of genotype-by-environment interactions on the rhizosphere microbiome in contrasting  
111 substrates.

## 112 **2 Material and Methods**

### 113 **2.1 Field site description and sampling methods**

114 Two mine sites, 50 km apart, located in Abitibi (western Quebec, Canada) were chosen for the  
115 contrasting characteristics of their mine wastes and for the fact that they both have balsam poplars  
116 naturally growing on the periphery, among other plant species such as willows (*Salix*), trembling  
117 aspen (*P. tremuloides*), alder (*Alnus*) and birch (*Betula*). The Westwood site, formerly the Doyon  
118 site, is characterized by its acid generating and coarse waste rock piles; the La Corne Mine site is  
119 dominated by neutral and fine-grained tailing piles. Both mine wastes are nutrient poor. The  
120 Westwood site is a former gold mine, recently put back into operation and owned by IAMGOLD  
121 Corporation. The La Corne Mine site is a former molybdenum and bismuth mine out of operation  
122 since 1972 and owned by Romios. See Figures S1 and S2 for pictures of the sites and Figure S3 for a

123 summary of the field and the greenhouse experiments. Mine wastes, vegetated soil samples and tree  
124 cuttings were sampled in November 2016.

### 125 **2.1.1 Soil sampling on site**

126 Approximately 150 L of mine waste was collected from the tailing stockpiles at the La Corne Mine  
127 site as well as from waste rock stockpiles from the former Doyon mine site at the Westwood site.  
128 Samples were collected from the top 20 cm using a shovel and were stored in 25 L plastic boxes at  
129 4°C until used. Five subsamples of 15 g from both mine wastes were also taken for DNA extraction  
130 and physicochemical analyses. In addition, from each site, five samples of 15 g of bulk soil were  
131 collected from areas colonized by balsam poplars to assess the impact of vegetation on mine  
132 substrates in a natural setting. Upon arrival to the laboratory, subsamples were taken from each 15 g  
133 samples, placed in 1.5 mL tubes and stored at -20°C until DNA extraction. The remainder of each  
134 sample was air-dried for physicochemical analyses.

### 135 **2.1.2 Cuttings sampling and genotyping**

136 Eight mature balsam poplars per mine site and two from a natural forest near the La Corne Mine site  
137 were selected, from which branches were harvested to produce cuttings. Branches were dormant  
138 when collected. Harvested branches were kept on ice during transport and stored frozen at -5°C  
139 immediately upon arrival to the laboratory, until used. In order to reduce the risk of harvesting the  
140 same genotype (clone), trees were sampled at a minimum distance of approximately 200 m. Their  
141 unique genotypes were then verified using a 40 SNP-array designed to reveal *P. balsamifera*  
142 intraspecific variations (Table S1), as described by Meirmans *et al.* (2017). For this, DNA was  
143 extracted from bud tissue using a Nucleospin 96 Plant II kit (Macherey-Nagel, Bethlehem, PA, USA)  
144 following the manufacturer's protocol for centrifugation processing with the following modification:  
145 buffer PL2 was used at the cell lysis step and was heated for 2 h at 65°C instead of 30 min. All  
146 samples were sent to the Genome Quebec Innovation Centre at McGill University to be genotyped.

## 147 **2.2 Cuttings selection and growth**

148 From November 2016 to January 2017, cuttings were first started using a hydroponic system (see  
149 below) to better allow for root development, then transferred into pots and grown until the end of  
150 April 2017. Trees were at least 30 cm tall at the start of the experiment. Genotypes for which a  
151 minimum of nine replicates (three replicates per substrate type) remained at the end of the tree  
152 production process were kept for the experiment, leaving four genotypes per mine site and two  
153 genotypes from the natural forest.

154 Ten cuttings, each containing three buds, were prepared from the tree branches collected from each  
155 tree in the field. The base of each was cut diagonally, dipped in a rooting powder (STIM-ROOT No3,  
156 Plant Product Co. LTD) and inserted into a rooting medium (ROOTCUBES® 1½' square, Smithers-  
157 OASIS) in the hydroponic system. Buds containing flowers were removed. The cuttings were  
158 watered automatically twice a day, at 08:00 and 20:00, for 4 minutes (just enough time for the  
159 container to be filled and drained slowly). Day/night greenhouse temperatures were set at 22/18°C  
160 with 16 hours supplemented lighting (less than 250 W/m<sup>2</sup>) between 08:00 and 24:00. Every four  
161 weeks of growth in hydroponic, a rooting fertilizer (8 mL / 40 L; Roots&Rhizo, Fred T. Lizer) was  
162 added to the irrigation system to help root development.

163 After two months of growth in the hydroponic system, cuttings were transferred to pots. The potting  
164 mix consisted of four parts peat (Agro Mix G6, Fafard), two parts vermiculite (Perlite Canada Inc.)  
165 and one part Turface (calcined clay particles, Turface MVP, Turface Athletics®). The potting mix

166 was watered and autoclaved to kill insects potentially present in the peat. Nine grams of slow release  
167 fertilizer 18.6.8 (Nutricote Total, Type:100, Chisso-Asahi Fertilizer Co. LTD) was then added per  
168 liter of potting mix. Cuttings were planted in 250 mL square pots. Temperature and light conditions  
169 were the same as for the hydroponic growth. For the first two months, the trees were watered  
170 automatically by a drip irrigation system twice a day for 3 minutes at 08:00 and 20:00. For the last  
171 month, the watering program was changed to three times per day for 5, 3 and 5 minutes at 08:00,  
172 16:00 and 24:00. Trees were given extra manual watering as required.

## 173 **2.3 Greenhouse experiment**

### 174 **2.3.1 Soil sieving and mixing**

175 Mine wastes were sieved through a 10 mm sieve before use. A peat mix composed of four parts peat,  
176 two parts vermiculite and one part Turface was also prepared. Using a cement mixer, equal volumes  
177 of mine wastes and the peat mix were combined. Thus, three treatments were obtained: (1) the mix  
178 containing waste rock from the Westwood site and the peat mix (waste rock; WR); (2) the mix  
179 containing tailings from the La Corne Mine site and the peat mix (tailing; TA); and (3) a control  
180 substrate composed of peat, vermiculite, Turface and slow release fertilizer as described in section  
181 2.2 (control; CO).

### 182 **2.3.2 Experimental design**

183 At the end of April, three trees from each genotype were repotted in 4 L pots with each mixture  
184 treatment and randomly distributed in a greenhouse. The trees were again watered automatically  
185 using the drip irrigation system three times per day for 5 minutes at 08:00, 16:00 and 24:00.  
186 Temperature and light settings were as described previously.

187 The trees were transferred outside in August after they formed buds and started to lose leaves so as to  
188 harden off naturally. Plants were watered manually as required. The trees were returned to the  
189 greenhouse in January set to a day/night temperature of 10/5°C with 10 hours of supplemented  
190 lighting from 08:00 to 16:00 hours. The trees were immediately cut back to between 30 cm and 50  
191 cm high so as to keep 10 buds per tree, including both lateral and terminal buds. Temperature and  
192 lighting were gradually raised by 5°C and two hours respectively at two weeks interval until reaching  
193 maximum day/night temperatures of 22/18°C and 14 hours lighting (between 06:00 and 20:00).  
194 Irrigation started one week after the first buds started to flush, again using the drip irrigation system.  
195 Trees were initially watered for 3 minutes at 08:00 once every three days. After ten days, this was  
196 increased to once every two days, then to once a day a week later, and finally to twice a day, for 5  
197 minutes, at 08:00 and 20:00 11 days after that. The trees were grown for about three months, until  
198 they naturally set bud.

### 199 **2.3.3 Tree growth and health measurements**

200 The following parameters were measured to assess tree growth and health during the two growing  
201 seasons: variation in height (growth); chlorophyll content of leaves; shoot diameter; and dry biomass  
202 of shoots and leaves. Height was measured from the soil surface to the terminal bud at the beginning  
203 and end of the first season. Height was not measured during the second season because trees were cut  
204 back to 40-50 cm at the start of the season. Growth was expressed as a percentage of the difference in  
205 heights between the beginning of the experiment and the end of the first season of growth:

$$206 \quad \% \text{Growth} = \frac{\text{Height}_{\text{day 91}} - \text{Height}_{\text{day 4}}}{\text{Height}_{\text{day 91}}} \times 100$$



207 As an estimation of leaf nitrogen content, the leaf chlorophyll content, or “greenness”, was measured  
208 with a spectrophotometer, following the manufacturer’s instructions (SPAD 502 Plus Chlorophyll  
209 Meter, Spectrum Technologies, Inc.). Chlorophyll measurements were made around the middle of  
210 each growing season, starting on the fifth leaf from the base of the plant and on every third leaf  
211 thereafter, avoiding diseased or immature leaves that were not representative of the whole tree. Shoot  
212 diameter was measured 20 cm above the initial cutting at the end of the experiment. Dry biomass was  
213 the total mass of the shoot and leaves from the second growth season after drying at 50°C for 7 days.  
214 Appearance of leaves was noted once a week during the two growing seasons.

#### 215 **2.3.4 Rhizosphere and bulk sampling**

216 Trees were removed from their pots and the shallow roots removed. Fine roots less than 2 mm in  
217 diameter were then sampled, avoiding the taproot in the center of the pots. Bulk soil was obtained by  
218 collecting the soil that detached from those roots with gentle shaking. Rhizosphere soil, the soil still  
219 attached to the roots after shaking, was then collected by placing the roots into 50 mL Falcon tubes  
220 containing 25 mL of sterile PBS (8 g NaCl, 0.2 g KCl, 1.44 g Na<sub>2</sub>HPO<sub>4</sub>, 0.24 g KH<sub>2</sub>PO<sub>4</sub>, pH 7.4, 1 L  
221 distilled water). After briefly shaking the tubes, the roots were removed, the tubes centrifuged at  
222 4700 RPM for 10 minutes at 4°C, and the supernatant discarded. The pellet or rhizosphere soil, was  
223 then collected and placed on sterile filter papers to absorb excess moisture, then stored in 1.5 mL  
224 tubes at -20°C until DNA extraction.

#### 225 **2.4 Processing of samples**

##### 226 **2.4.1 Physicochemical analyses of bulk soil**

227 Samples of bulk soil, either collected directly on the mine sites or from the greenhouse experiment,  
228 were air-dried, sieved at 2 mm, and kept in plastic bags until further processing. One gram of soil  
229 was ground to a fine powder of 0.5 mm prior to physicochemical analyses for carbon, nitrogen and  
230 sulfur.

231 Carbon (C), nitrogen (N) and sulfur (S) were quantified using the TruMac® CNS analyzer (LECO  
232 Corporation, MI, USA) following the manufacturer’s protocol. Water pH and buffer pH were  
233 measured using the methods described by the Canadian Society of Soil Science (Gregorich and  
234 Carter, 2007) using the Thermo Scientific™ Orion™ 2-Star Benchtop pH meter. Extractable  
235 phosphorus (P) and exchangeable cations (potassium (K), calcium (Ca), magnesium (Mg),  
236 manganese (Mn), iron (Fe), aluminum (Al), and sodium (Na)) were extracted with a Mehlich III  
237 extraction buffer (Gregorich and Carter, 2007) and analyzed by inductively coupled plasma (ICP)  
238 using an optical emission spectrometer (OES) (Optima 7300 DV, Perkin Elmer, Waltham, MA).

##### 239 **2.4.2 DNA isolation and library preparation**

240 Bulk soil samples from the field experiment and rhizosphere soil samples from the greenhouse  
241 experiment were kept for microbiome analyses. Up to 250 mg of these samples were transferred to  
242 PowerBead tubes for DNA extraction using the DNeasy PowerSoil DNA Isolation Kit (Qiagen,  
243 Valencia, CA, USA), in accordance with the manufacturer’s instructions, except that DNA was  
244 eluted in 50 µL instead of 100 µL. DNA was quantified using a Qubit dsDNA HS Assay Kit and  
245 Qubit Fluorometer (Thermo Fisher Scientific, Waltham, MA, USA). Library preparation for Illumina  
246 sequencing was performed according to the manufacturer’s instructions for user-defined primers

247 (Illumina, 2013)<sup>1</sup>, with the following modifications. Each sample was amplified in triplicate to ensure  
248 reproducibility (Schmidt *et al.*, 2013; Kennedy *et al.*, 2014). Bacterial communities were amplified  
249 using primers 515F-Y (5'-GTGYCAGCMGCCGCGGTAA-3') and 926R (5'-  
250 CCGYCAATTYMTTTRAGTTT-3') targeting the V4-V5 regions of the 16S rRNA gene of bacteria  
251 and archaea (Parada *et al.*, 2016; Rivers, 2016). The ITS2 region of the fungal ribosomal DNA was  
252 amplified using the primer set ITS9F (5'-GAACGCAGCRAAIIGYGA-3') and ITS4R (5'-  
253 TCCTCCGCTTATTGATATGC-3') (White *et al.*, 1990; Rivers, 2016). Primers contained the  
254 required Illumina adaptors at the 5' end of the primer sequences (5'-  
255 TCGTCGGCAGCGTCAGATGTGTATAAGAGACAG-3' for the forward primer and 5'-  
256 GTCTCGTGGGCTCGGAGATGTGTATAAGAGACAG-3' for the reverse primer). PCR reactions  
257 were set up by first mixing 37.5 µl of HotStarTaq Plus Master Mix (QIAGEN Inc., Germantown,  
258 MD, USA), 27 µL RNase-free water, 1.5 µL of each 10 µM primer and 7.5 µL of gDNA at 5 ng/µL.  
259 The final volume of 75 µL was then equally distributed in three 96-well plates placed in distinct  
260 thermocyclers. Thermal cycling conditions were as follows: initial denaturation at 95°C for 5  
261 minutes; 40 cycles (for ITS2 amplification; and 35 cycles for 16S amplification) at 94°C for 30 s,  
262 50°C for 30 s, 72°C for 1 minute; and a final elongation at 72°C for 10 minutes. PCR products were  
263 pooled and purified using 81 µL of magnetic beads solution (Agencourt AMPure XP), then unique  
264 codes were added to each sample using the Nextera XT Index Kit, in accordance with the above-  
265 mentioned Illumina's protocol. Indexed amplicons were purified with magnetic beads, quantified  
266 using a Qubit dsDNA BR Assay Kit (Thermo Fisher Scientific, Waltham, MA, USA) and combined  
267 at equimolar concentration. Paired-end sequencing (2 × 250 bp) of the pools was carried out on an  
268 Illumina MiSeq at the Illumina Sequencing Platform, Nucleic Acids Solutions, Aquatic and Crop  
269 Resource Development, National Research Council Canada-Saskatoon. To compensate for low base  
270 diversity when sequencing amplicon libraries, PhiX Control v3 Library was denatured and diluted to  
271 12.5 pM before being added to the denatured and diluted amplicon library at 15% v/v. The amplicon  
272 libraries were sequenced at a concentration of 6.5 pM for most of the sequencing runs. The Illumina  
273 data generated in this study was deposited in the NCBI Sequence Read Archive and is available  
274 under the project number PRJNA615167.

## 275 **2.5 Bioinformatic analyses**

### 276 **2.5.1 Sequences assignment**

277 All bioinformatics analyses were performed in QIIME (version 1.9.1) (Caporaso *et al.*, 2010).  
278 Briefly, sequence reads were merged with their overlapping paired-end (fastq\_mergepairs), trimmed  
279 to remove primers (fastx\_truncate), and filtered for quality (fastq\_filter) using USEARCH (Edgar,  
280 2010). Unique identifiers were inserted into the header of the remaining high-quality sequences, and  
281 sequences from the different samples were pooled together (add\_qiime\_labels) prior to further  
282 analyses.

283 UPARSE (Edgar, 2013) was then used to dereplicate the sequences (derep\_fulllength), discard  
284 singletons (sortbysize), group high quality reads into operational taxonomic units (OTUs) using a  
285 97% identity threshold (cluster\_otus) (Schloss *et al.*, 2009), and identify chimeras (uchime\_ref). The  
286 taxonomic assignment of OTUs was done using the QIIME "assign\_taxonomy" command with  
287 Mothur as the assignment method and Greengenes Database (McDonald *et al.*, 2012) files as the  
288 reference for bacteria and the UNITE database (Abarenkov *et al.*, 2010) files for fungi. The

---

<sup>1</sup> [https://support.illumina.com/content/dam/illumina-support/documents/documentation/chemistry\\_documentation/16s/16s-metagenomic-library-prep-guide-15044223-b.pdf](https://support.illumina.com/content/dam/illumina-support/documents/documentation/chemistry_documentation/16s/16s-metagenomic-library-prep-guide-15044223-b.pdf)

289 “make\_OTU\_table” command was then used to generate the OTU table in the “biom” format, which  
290 was then used by QIIME in the next steps. OTUs from nonbacterial (or nonfungal) taxa were  
291 excluded using the “filter\_taxa\_from\_otu\_table” command. For the 16S rRNA analysis, sequences  
292 corresponding to chloroplasts, mitochondria and to the kingdom *Plantae* were removed; for the ITS2  
293 analysis, sequences assigned to the kingdom *Protozoa*, *Protista*, *Chromista* and *Plantae* were  
294 removed.

295 OTUs with relative abundances below 0.005% were excluded as previously described (Bokulich *et*  
296 *al.*, 2013) prior to diversity analyses using the “filter\_otus\_from\_otu\_table” command. Each sample  
297 was rarefied to the lowest number of reads observed among libraries from each data set with  
298 QIIME’s “single\_rarefaction” command, so the rarefied samples all contained the same number of  
299 sequences. Finally, the OTU rarefied list file was used in QIIME’s “core\_diversity\_analyses” and  
300 “alpha\_diversity” commands to generate alpha diversity measures (chao1 and Shannon indices),  
301 calculate the beta-diversity between samples (Bray-Curtis dissimilarity), and generate community  
302 composition profiles at different taxonomic levels.

303 Fungal functional groups were predicted using a homemade Python script based on a predetermined  
304 list of fungi genus associated with their respective function (Tedersoo *et al.*, 2014). First, the script  
305 optimizes the list to detect and remove non-unique entries (these data are compared to each other to  
306 determine which data contains the most information). The corrected data is then compared to an  
307 excel file, where the genus is the search key: the script analyzes each line of the file to extract the  
308 genus of each OTU; this genus is then compared to a reference library to identify the associated  
309 biological function. OTUs unidentified to the genus level are assigned unidentified function.

## 310 **2.5.2 Statistical analyses**

311 Statistical analyses were conducted in R version 3.5.3 (Rproject.org) and figures were produced  
312 using the package “ggplot2” package. Statistical significance was determined at  $p < 0.05$  throughout  
313 the analyses. Parametric assumptions were verified before analysis: data normality was checked  
314 graphically with normal quantile–quantile plots and computationally with the Shapiro–Wilk test of  
315 normality using the “shapiro.test” function. Homoscedasticity was verified using both the Bartlett test  
316 (“bartlett.test” function) and the Fligner-Killeen test (“fligner.test” function). Data were transformed  
317 using square root (“sqrt” function) or Tukey’s Ladder of Powers (“transformTukey” function,  
318 “rcompanion” package) when necessary to meet parametric ANOVA assumptions. A generalized  
319 least squares model (“nlme” package) with a stepwise selection and Akaike’s Information Criterion  
320 (AIC) minimization approach was performed with vegetation presence (vegetated or unvegetated  
321 soil) and waste type (waste rock or tailings) as explanatory variables for the field experiment and tree  
322 genotype and substrate type (WR, TA or CO) as explanatory variables for the greenhouse  
323 experiment. Genotype origin (La Corne Mine site, Westwood site or natural forest) was also included  
324 in these models (“corComSymm” correlation) to account for its overall large influence. Substrate  
325 types were weighted (“varIdent”, weights) to reduce variance due to the fact that they were highly  
326 different in their physicochemical properties.

327 Two-way ANOVAs (“anova” function) were used to discern how waste type, vegetation presence,  
328 substrate type, genotype, and their interactions influenced taxa relative abundances, physicochemical  
329 properties of substrates, and alpha diversity indices. When a factor was revealed as a statistically  
330 significant predictor, a Tukey HSD post-hoc pairwise comparison test (“predictmeans” function,  
331 adjusted to “tukey”, “predictmeans” package) was performed between all treatments. For the  
332 greenhouse experiment, if the interaction between substrate type and genotype was deemed



333 statistically significant, additional analyses were performed for each substrate type separately to  
334 better assess the effect of genotype.

335 Spearman linear correlation analyses were performed using the “corr.test” function (“psych”  
336 package) to determine if there were correlations between physicochemical properties of the  
337 substrates, tree growth and taxa relative abundances for both field and greenhouse experiments.

338 Non-Euclidean distances were calculated from Bray Curtis dissimilarity matrices and implemented in  
339 a non-metric multidimensional scaling plot (NMDS, “metaMDS” function, “vegan” package) to  
340 visualize both bacterial and fungal community compositional differences between vegetation  
341 presence and waste type on the field, and balsam poplar genotypes and substrate type in the  
342 greenhouse experiment. A permutational multivariate analysis of variance model (PERMANOVA,  
343 “adonis2” function, “vegan” package; (Oksanen *et al.*, 2019)) was also implemented to discern the  
344 amount of variation attributed to each factor and their interaction (with 999 permutations). Additional  
345 multivariate analyses were performed on communities from each substrate type of the greenhouse  
346 experiment separately to better assess the effect of genotype. Variance heterogeneity between the a  
347 priori selected groups was tested with the functions “betadisper” and “permutest”, in the “vegan”  
348 package. Clusters between treatments were determined by a multilevel pairwise comparison test  
349 (“pairwise.adonis2” function, “pairwiseAdonis” package). Correlations between NMDS axes and  
350 physicochemical properties of substrates were determined using the “envfit” function (with 999  
351 permutations, “vegan” package).

352 One sample (genotype C21 in control substrate) was removed from analyses because its results were  
353 considered aberrant. Two samples (genotype W13 in tailings and waste rock) failed to amplify and/or  
354 get sequenced for ITS and were therefore excluded from further analyses.

### 355 **3 Results**

#### 356 **3.1 Assessment of vegetation’s effect on mine wastes under field conditions**

##### 357 **3.1.1 Soil physicochemical properties**

358 Physicochemical analyses of the mine wastes indicated absence of N, low concentration of C and  
359 macronutrients such as P and K, and a relatively high concentration of elements like Fe and S in the  
360 waste rock from the Westwood site (Table 1). Additionally, the pH of waste rock was highly acidic  
361 with values varying between 2.47 and 3.02, whereas in tailings from La Corne Mine site the pH was  
362 almost neutral with values between 5.93 and 7.77. For both tailings and waste rock, the vegetated  
363 soils contained significantly higher levels of C, N, K, P, Ca, Mg and Mn than the mine wastes (Table  
364 1). Vegetation also reduced S and Fe concentrations and increased pH in waste rock, and reduced pH  
365 in tailings.

##### 366 **3.1.2 Microbiome analyses**

###### 367 **3.1.2.1 Alpha diversity**

368 Factorial analyses of alpha diversity indices (Figure 1) indicated that vegetation presence (vegetated  
369 vs unvegetated soil), waste type (tailings vs waste rock) and the interaction between both factors had  
370 a consistently significant effect on bacterial richness (chao1 index:  $p < 0.005$ ) and diversity (Shannon  
371 index:  $p < 0.001$ ). For fungal richness and diversity, the interaction between factors was not  
372 significant ( $p = 0.066$  and  $0.355$ ). Pairwise comparison of alpha diversity indices indicated that

373 vegetation presence significantly ( $p < 0.05$ ) increased bacterial richness in both waste types and  
374 bacterial diversity in waste rock; and reduced fungal richness and diversity in both waste types.

### 375 **3.1.2.2 Beta diversity**

376 Analysis of beta diversity (Figure S4) indicates that bacterial and fungal community structures highly  
377 differed between waste types and vegetation presence. The model explains 62% and 35% of the  
378 variation in bacterial and fungal community structure, respectively. The main driver of bacterial and  
379 fungal community structure was vegetation presence ( $R^2 = 31.4\%$  and  $18.9\%$ , respectively). Waste  
380 type also had a significant effect on community structure ( $R^2 = 14.6\%$  and  $9.7\%$ ). The interaction  
381 between these two factors being significant ( $R^2 = 14.7\%$  and  $6.7\%$ ), a multilevel pairwise comparison  
382 test was performed on all combinations of waste type by vegetation presence. All combinations  
383 clustered separately, indicating that bacterial and fungal community structures differed between each  
384 treatment.

### 385 **3.1.2.3 Taxonomic profiles**

386 Taxonomic profiling of bacterial and fungal communities revealed high heterogeneity as shown by  
387 the variability among field replicates. Many bacterial and fungal taxa were only identified at a high  
388 taxonomic level. Figure 2 illustrates the relative abundance of the most abundant taxa ( $>1\%$ , at the  
389 genus level) in vegetated soil and mine wastes, at the La Corne Mine site and the Westwood site.

390 Factorial analyses of the relative abundances of bacterial taxa (for taxa  $>1\%$ , Table S2) showed that  
391 waste type had a significant effect on 32 taxa, vegetation presence had a significant effect on 44 taxa,  
392 and a significant interaction between both factors was detected for 40 taxa. Pairwise comparisons  
393 between all treatments revealed that 50 of the 51 most abundant bacterial taxa ( $>1\%$ , at the genus  
394 level) had a significant difference in at least one treatment ( $p < 0.001$ ). In fungal communities (Table  
395 S2), waste type had a significant effect on 11 taxa, vegetation presence had a significant effect on 21  
396 taxa and a significant interaction between both factors was detected for 11 taxa. Pairwise comparison  
397 between all treatments showed a significant difference in at least one treatment for 21 of the 47  
398 fungal taxa ( $p < 0.01$ ).

399 The presence of vegetation on mine wastes reduced the relative abundance of microorganisms  
400 associated with acid mine drainage like *Acidiphilium*, *Leptospirillum* and *Sulfobacillaceae\_g* on  
401 waste rock (Harrison Jr, 1981; Hippe, 2000; Hottenstein *et al.*, 2019) (Figure 2). Additionally, it also  
402 reduced the relative abundance of fungal plant pathogens like *Alternaria* and *Ganoderma* on tailings  
403 and *Teratosphaeriaceae* on waste rock. Conversely, the presence of vegetation increased the relative  
404 abundance of many microorganisms previously found in rhizosphere samples and associated with  
405 beneficial ecological functions like the ectomycorrhiza *Meliniomyces* on tailings and the rhizobacteria  
406 *Burkholderia* (Caballero-Mellado *et al.*, 2004) and *Rhodoplanes* (Sun *et al.*, 2015) on both mine  
407 wastes.

408 Functions associated with fungal community in all samples comprised ectomycorrhizae (35%),  
409 saprotrophs (27%), ericoid mycorrhizae (13%), plant pathogens (3%), white rot (1%) and lichenized  
410 (1.8%) and arbuscular (0.05%) mycorrhizae. Factorial analyses of the relative abundances of fungal  
411 functions (Table S2) showed that there was no effect of waste type nor interaction between waste  
412 type and vegetation presence on functional group prevalence. Pairwise comparisons between all  
413 treatments revealed that there was no effect of vegetation on the relative abundance of fungal  
414 functions in waste rock. However, the presence of vegetation on tailings significantly increased ( $p <$   
415  $0.001$ ) the relative abundance of ectomycorrhizae and ericoid mycorrhizae; and significantly

416 decreased the relative abundance of saprotrophs ( $p < 0.001$ ), plant pathogens ( $p < 0.001$ ) and  
417 arbuscular mycorrhizae ( $p = 0.003$ ).

418 All bacterial and fungal taxa were significantly correlated with at least one physicochemical property  
419 of the substrates (Table S3). Bacterial genera like *Leptospirillum* and *Acidiphilium*, two bacterial  
420 genera associated with the oxidoreduction of iron and acid mine drainage (Harrison Jr, 1981; Hippe,  
421 2000) were strongly correlated with iron content and the reduction of pH. Similarly,  
422 *Sulfobacillaceae*, a bacterial family associated with the oxidation of sulfur and acid mine drainage  
423 (Hottenstein *et al.*, 2019) was strongly correlated with sulfur content and the reduction of pH.

## 424 **3.2 Assessment of genotype-by-environment effect under greenhouse experiment**

### 425 **3.2.1 Tree growth**

426 Tree growth measurements showed a significant effect of genotype for all parameters, an effect of  
427 substrate on three parameters and an interaction between both factors for one parameter only (Figure  
428 3). Tree growth (Fig. 3A), the number of days before buds start to open at the beginning of the  
429 second season (Fig. 3B) and chlorophyll content during the first season (Fig. 3C) differed among  
430 plant genotypes ( $p < 0.001$ ) but not between substrate types ( $p = 0.155, 0.323$  and  $0.628$   
431 respectively); the interaction between both factors was not significant for these parameters ( $p =$   
432  $0.526, 0.498$  and  $0.595$ ). Shoot diameter (Fig. 3E) and biomass produced during the second season  
433 (Fig. 3F) differed among plant genotypes ( $p < 0.001$ ) as well as between substrate types ( $p < 0.001$   
434 and  $0.008$  respectively), but again no significant interaction was detected ( $p = 0.937$  and  $0.361$ ).  
435 Shoot diameter and plant biomass measurements were greater in the nutrient-rich control substrate  
436 versus mine substrates. Chlorophyll content during the second season (Fig. 3D) differed between  
437 genotypes and it was greater in the waste rock for some genotypes (significant interaction between  
438 genotype and substrate type,  $p < 0.001$ ).

439 The genotypes having lower or higher values strongly differed depending on the measured growth  
440 parameter (Figure 3). As an example, genotypes W08, W10, W13 and C29 had lower values for most  
441 parameters except for their chlorophyll content after the second season of growth in mine substrates,  
442 for which they had the highest values. Besides, genotypes W09 and N16 had the highest biomass and  
443 highest growth, respectively, but had lower values for other parameters. Genotype N33 had  
444 intermediate to high values for all parameters.

445 There was an overall effect of cuttings origin (either the Westwood site: W; the La Corne Mine site:  
446 C; or the Natural forest: N) on measured growth parameters when the effect of substrate type was not  
447 significant (Figure S5): W genotypes grew significantly less than C and N genotypes (Fig. S4A,  $p <$   
448  $0.001$ ); C genotypes flushed later than W and N genotypes (Fig. S4B,  $p < 0.001$ ); and C genotypes  
449 had a higher chlorophyll content during the first season than W genotypes (Fig. S4C,  $p < 0.001$ ).

450 When the effect of substrate type was significant, there was no obvious association between cuttings  
451 origin and their growth in the substrate from which they came from. For example, the genotypes that  
452 had a higher chlorophyll content in tailings were not only those originating from the La Corne Mine  
453 site (Fig. 3D). For shoot diameter (Fig. 3E) and plant biomass (Fig. 3F), there was no significant  
454 difference between mine substrates.

### 455 **3.2.2 Soil physicochemical properties**

456 A factorial analysis of the physicochemical properties of substrates revealed that all parameters were  
457 significantly affected by substrate type, 11 of the 13 parameters had a significant effect of genotype,

458 and the interaction between substrate type and genotype was significant for 10 parameters (Table S4).  
459 To better assess the effect of genotype, pairwise comparisons were made on each substrate type  
460 separately (Tables 2 and S5). All physicochemical properties were significantly affected by genotype  
461 in at least one substrate. Although significant, the differences between genotypes were small,  
462 generally resulting in only two genotypes being different from the others.

463 Genotypes having a significant effect on physicochemical properties varied depending on the  
464 substrate type (Table 2). For example, genotypes associated with higher carbon content were W13  
465 and C29 in the control substrate; C21 and C25 in tailings; and W13 in waste rock.

466 General trends were observable for some genotypes (Table 2). In all substrates, genotypes W08 and  
467 N16 were associated with less favorable soil conditions (lower nutrient and higher sulfur content). In  
468 waste rock, genotype C21 led to the lowest content of all elements and the lowest pH, but, in tailings,  
469 it was associated with higher nutrient content. In both mine substrates, genotype C29 was associated  
470 with higher nutrient content and pH.

471 There was an overall effect of the origin of the cuttings on the physicochemical properties of the  
472 substrates. Indeed, several elements showed higher concentrations when genotypes were grown in  
473 their original mine waste: in tailings, C ( $p = 0.003$ ), N ( $p < 0.001$ ), Ca ( $p = 0.019$ ) and Mn ( $p =$   
474  $0.029$ ) contents were higher for genotypes originating from La Corne Mine; in waste rock, C ( $p =$   
475  $0.022$ ), N ( $p < 0.001$ ) and K ( $p = 0.002$ ) contents were higher for genotypes originating from  
476 Westwood. Lastly, plant biomass was significantly, albeit weakly, correlated with N and Na contents  
477 of the substrates (Table S6).

### 478 **3.2.3 Microbiome analyses**

#### 479 **3.2.3.1 Alpha-diversity**

480 Factorial analyses of alpha diversity indices indicated that substrate type had a significant effect on  
481 bacterial and fungal richness (chao1:  $p < 0.001$ ) and diversity (Shannon:  $p < 0.001$  and  $0.004$ ; Figure  
482 4). There was a significant interaction between substrate type and genotype on bacterial diversity ( $p$   
483  $= 0.031$ ). Pairwise comparison between substrate types indicated that bacterial richness ( $p < 0.001$ )  
484 and diversity ( $p < 0.001$ ) were significantly higher in tailings compared to waste rock and control  
485 substrate, but that fungal richness ( $p < 0.001$ ) and diversity ( $p = 0.001$ ) were higher in the control  
486 substrate than in mine substrates. Alpha diversity was analyzed by substrate type to better assess the  
487 effect of genotype. Bacterial richness was higher in genotype C29 compared to genotype C21 in the  
488 waste rock ( $p = 0.040$ ; chao1 index, Figure 4). There was no effect of genotype on fungal alpha  
489 diversity.

#### 490 **3.2.3.2 Beta-diversity**

491 Bacterial and fungal community structure highly differed between substrate types as shown by  
492 variation in beta diversity (Figure 5). The main driver of bacterial and fungal community structure  
493 was substrate type ( $R^2 = 54.9\%$  and  $47.0\%$ , respectively), and a multilevel pairwise comparison test  
494 revealed that all substrate types, for bacterial and fungal communities, clustered separately ( $p <$   
495  $0.001$ ). In bacterial beta diversity, genotype and the interaction between substrate type and genotype,  
496 explained, respectively, 7.4% and 11.3% of the variation in rhizosphere community structure.  
497 Genotype and the interaction were not significant for the fungal community structure. All  
498 physicochemical properties of the substrates were significantly ( $p < 0.001$ ) correlated with bacterial  
499 and fungal community structures as shown by the arrows on Figure 5.



500 Beta diversity was analyzed by substrate type separately to better assess the effect of genotype on  
501 bacterial and fungal community structure (Figure S6). There were differences in bacterial community  
502 structure between a few genotypes in both mine substrates (Figures S6B, C) and in tailings for fungal  
503 community structure (Figure S6E). In all substrates, bacterial and fungal community structure was  
504 correlated with at least one physicochemical property (arrows in Figure S6).

### 505 **3.2.3.3 Taxonomic profiles**

506 Figure 6 illustrates the relative abundance of the most abundant bacterial and fungal taxa (>1%, at the  
507 genus level) in the rhizosphere of balsam poplars after two seasons of growth in tailings, waste rock  
508 and control substrates. Many bacterial and fungal taxa were only identified at a high taxonomic level.

509 Functions associated with fungal community of the rhizosphere comprised mostly ectomycorrhizae  
510 (40%), saprotrophs (22%), plant pathogens (5%), ericoid mycorrhizae (1%) and brown rot (1%).  
511 Factorial analyses of the relative abundance of each function (Table S7) revealed that substrate type  
512 had a significant effect on the relative abundance of ectomycorrhizae, saprotrophs, plant pathogens,  
513 ericoid mycorrhizae and white rot. Pairwise comparisons between genotypes among each substrate  
514 type were performed to better assess the effect of genotype. The effect of genotype was significant on  
515 the relative abundance of ericoid mycorrhizae in waste rock: they were more abundant in the  
516 rhizosphere of genotype N33 compared to genotypes W09, C25 and C29 ( $p = 0.005$ ).

517 Factorial analyses of taxa abundance in bacterial and fungal communities (for taxa >1%, Table S8)  
518 showed that the effect of substrate type was significant for all bacterial taxa and most fungal taxa  
519 (24/29); the effect of genotype was significant for many bacterial and fungal taxa (17/30 and 7/29,  
520 respectively); and the interaction between substrate type and genotype was significant for a few  
521 bacterial and fungal taxa (13/30 and 5/29, respectively). Pairwise comparisons between genotypes  
522 among each substrate type were made to better assess the effect of genotype. The effect of genotype  
523 was significant in at least one substrate for half of bacterial taxa (17/30) and for a few fungal taxa  
524 (5/29). The bacterial and fungal taxa significantly affected by genotype were marked with stars in  
525 Figure 6.

526 The relative abundance of most bacterial and fungal taxa was significantly correlated with  
527 physicochemical properties of substrates (Table S9). In waste rock, bacterial and fungal communities  
528 were characterized by acid tolerant taxa like the bacterial family *Xanthomonadaceae* (Callender *et*  
529 *al.*, 2016) and the fungal genus *Acidea* (Hujslová and Gryndler, 2019), while the tailings were  
530 dominated by microorganisms tolerant to stress like the oligotrophic bacterial genus *Geobacter*  
531 (Wilkins *et al.*, 2008). As for the community composition of the control substrate, it was mostly  
532 composed of decomposer microorganisms like the bacterial family *Chitinophagaceae* (Rosenberg,  
533 2014) and the fungal genus *Chrysosporium* (Tedersoo *et al.*, 2014). A few plant growth parameters  
534 were weakly correlated ( $|0.3| < r < |0.5|$ ) with the relative abundance of a few bacterial and fungal  
535 taxa (Table S10).

536 There was an overall effect of the origin of the cuttings on the relative abundance of bacterial and  
537 fungal taxa (Table S11). For example, the bacterial genus *Bradyrhizobium* was more abundant in the  
538 rhizosphere of genotypes originating from the La Corne Mine site compared to the genotypes  
539 originating from the Westwood site, in the control substrate ( $p = 0.030$ ).

## 540 **4 Discussion**

### 541 **Vegetation improved physicochemical properties of mine wastes *in situ***

542 In this study, the impact of naturally grown *P. balsamifera* on two contrasting mine wastes was  
543 assessed *in situ*. These mine wastes were considered unfavorable for plant growth because they  
544 contain only small concentrations of essential nutrients, have either a very low or very high pH and  
545 have poor physical structure and deficient water holding capacity. The pioneer tree *P. balsamifera*  
546 has previously been found to naturally grow on mine sites (van Haveren and Cooper, 1992), a  
547 phenomenon that was also observed in this study on the highly distinct mine wastes from our two  
548 sites. On both sites, well established vegetation significantly improved most of the physicochemical  
549 properties of mine wastes, with an increase in carbon and nutrient (N, K, P, Ca and Mg) content, pH  
550 values closer to the natural forest soil samples, and a decrease in S and Fe concentrations in waste  
551 rock.

552 Increase in C and N comes from organic matter provided by the growth of balsam poplars; organic  
553 matter is further degraded by heterotrophic microorganisms in the soil. This increase in organic  
554 matter is responsible for the variations in pH as well as S and Fe. Indeed, soil organic matter buffers  
555 soil pH by binding to H<sup>+</sup> in acidic soil. Similarly, Fe binds to organic matter making it less available.  
556 Consequently, it has been shown that S adsorption decreases when pH is higher, Fe and Al oxides  
557 contents are lower and organic matter content is higher, leading to S uptake by plants and leaching  
558 (Johnson *et al.*, 1992).

#### 559 **Vegetation caused a beneficial shift in microbial communities of mine wastes**

560 Results from the field experiments are in line with other studies (Chen *et al.*, 2013; Li *et al.*, 2015,  
561 2016) that found a succession of microbial communities shifting from lithotrophic to heterotrophic  
562 microorganisms during plant growth on mine wastes. These shifts in microbial community structure  
563 suggest that initial soil conditions of mine wastes favoring the growth of lithotrophic microorganisms  
564 changed during the establishment of balsam poplars on site, confirming the positive influence of  
565 these trees on microbial community structure, function and ecosystem health. For example,  
566 *Leptospirillum* and *Acidiphilium*, two bacterial genera associated with the oxidoreduction of iron and  
567 acid mine drainage (Harrison Jr, 1981; Hippe, 2000), as well as *Sulfobacillaceae*, a bacterial family  
568 associated with the oxidation of sulfur and acid mine drainage (Hottenstein *et al.*, 2019), were found  
569 to be more abundant in unvegetated than in vegetated zones of the waste rock pile. A previous study  
570 also reported that vegetation growth on acid mine tailings lowered the abundance of these key iron  
571 and sulfur oxidizing bacteria and lowered acidity (Li *et al.*, 2016).

572 Surprisingly, the presence of vegetation on mine wastes also reduced the relative abundance of fungal  
573 taxa typically known as plant pathogens, suggesting that these fungi may have other ecological  
574 functions in disturbed lands. Some of these taxa, like *Alternaria*, *Ganoderma* and the  
575 *Teratosphaeriaceae* family, have also been previously isolated in mine wastes and various acidic  
576 environments (Wong, 1981; Hujslová *et al.*, 2013; Callender *et al.*, 2016; Mosier *et al.*, 2016). It was  
577 also surprising that the presence of vegetation on mine wastes reduced the relative abundance of  
578 fungal saprotrophs, as it would be expected that an increase in organic matter would also increase the  
579 presence of these microorganisms. These results illustrate a well-known limitation of the use of  
580 relative abundances in metabarcoding studies (Zhang *et al.*, 2017; Lin *et al.*, 2019). Although the  
581 relative abundance of saprotrophs was lower in the vegetated soil samples, the absolute abundance of  
582 these microorganisms might still be higher than in unvegetated mine wastes. This issue could be  
583 avoided in further studies by using quantitative PCR to estimate the total populations in these  
584 environments (Rastogi *et al.*, 2010) or by spiking exogenous bacteria, fungi or synthetic DNA prior  
585 to sample processing (Tourlousse *et al.*, 2017).

586 Furthermore, many rhizobacteria of the orders *Rhizobiales*, *Sphingomonadales* and *Burkholderiales*  
587 and the phylum *Planctomycetes*, *Bacteroidetes*, *Actinobacteria* and *Acidobacteria* were found to be  
588 more abundant in vegetated soil samples than in unvegetated mine wastes; however, at lower  
589 taxonomic levels, the taxa detected differed between waste rock and tailings. These taxa have  
590 previously been associated with the rhizosphere microbiome (da Rocha *et al.*, 2013; McBride *et al.*,  
591 2014; Madhaiyan *et al.*, 2015; Qiao *et al.*, 2017); plant growth promotion (e.g. through nitrogen  
592 fixation (Caballero-Mellado *et al.*, 2004; Dai *et al.*, 2014; Sun *et al.*, 2015; Jeanbille *et al.*, 2016); the  
593 production of IAA (Mehnaz *et al.*, 2010); or disease suppression (Xue *et al.*, 2015)), and nutrient  
594 cycling (Webb *et al.*, 2014; Santoyo *et al.*, 2016; Wu *et al.*, 2017). Similarly, vegetation increased the  
595 relative abundance of ectomycorrhizal taxa, such as *Meliniomyces*, which have previously been  
596 isolated from poplars growing in mine wastes (Gaster *et al.*, 2015; Katanić *et al.*, 2015).

597 For both mine sites, *Proteobacteria* were more abundant and the *Proteobacteria*-to-*Acidobacteria*  
598 ratio was higher in vegetated soils than in unvegetated mine wastes. This corroborates previous  
599 studies showing that this ratio is an indicator of soil trophic levels, and for which *Proteobacteria*  
600 were linked to nutrient-rich soils and *Acidobacteria* to nutrient-poor soils (Fierer *et al.*, 2007; Castro  
601 *et al.*, 2010). Gottel *et al.* (2011) found similar results in the rhizosphere of *Populus deltoides* in  
602 which *Proteobacteria* were slightly more prevalent than *Acidobacteria*.

### 603 **Vegetation increased bacterial richness and diversity**

604 Mine site restoration aims to mitigate the negative impacts of mining on the environment and human  
605 health. However, land restoration is a long process since the affected ecosystems have lost their plant  
606 and microbial biodiversity and most of their functions and services (Prach and Tolvanen, 2016). In  
607 this study, vegetation increased bacterial richness and diversity in mine substrates, which suggests an  
608 improvement in ecosystem productivity and stability (Tilman *et al.*, 2006). On the other hand, a  
609 decrease in fungal richness and diversity was observed in the vegetated soils compared to the mine  
610 wastes. This might be due to the competitive exclusion of ectomycorrhizal fungi on other fungi,  
611 particularly plant pathogens, corroborating other studies that have shown that disturbed lands have a  
612 greater fungal diversity than forested lands (Ding *et al.*, 2011).

### 613 **Substrate type has a stronger effect on community composition than genotype**

614 In the greenhouse experiment, substrate type was shown to be the main driver of bacterial and fungal  
615 community structure and diversity in the rhizosphere of balsam poplar. This is a consistent finding  
616 among studies about the *Populus* root microbiome (Gottel *et al.*, 2011; Bonito *et al.*, 2014; Veach *et*  
617 *al.*, 2019) and other plant species (Marschner *et al.*, 2004; Lebeis *et al.*, 2015; Wagner *et al.*, 2016;  
618 Colin *et al.*, 2017; Gallart *et al.*, 2018), indicating that larger-scale edaphic conditions primarily  
619 regulate overall rhizosphere microbiomes. Physicochemical properties, including granulometry and  
620 pH, and other unmeasured factors, like water holding capacity and variations in temperature and rain  
621 between seasons, contribute to those larger-scale edaphic conditions and likely play a role in the  
622 *Populus* root microbiome assembly (Chaparro *et al.*, 2012; Philippot *et al.*, 2013). Nevertheless, in  
623 this study, plant genotype also influenced physicochemical properties, but this indirect effect was too  
624 weak to be reflected on the community assembly. Furthermore, the effect of genotype varied between  
625 substrate types, as shown by the significant interaction between both factors for most bacterial and  
626 fungal taxa. Bonito *et al.* (2019) also found that soil origin and properties structured microbial  
627 communities to a greater degree than host genotype, and that OTUs enriched in genotype samples  
628 vary based on the soil properties in which the genotype was grown. This confirms our expectations of  
629 a weak genotype effect and indicates that OTUs that are enriched in a sample cannot be used to  
630 discriminate plant genotype.

631 **Tree genotype has low effect over fungal community structure, diversity and functional**  
632 **prevalence compared to bacterial community**

633 Similarly to the results obtained for the field experiment, diversity and structure of fungal community  
634 are much more conserved between treatments compared to bacterial community. Tree genotype had a  
635 significant effect on the relative abundance of 17 of the 30 most abundant bacterial taxa in at least  
636 one substrate type but only 5 of the 29 most abundant fungi. Additionally, while all bacterial taxa  
637 were affected by substrate type, five fungal taxa were not. Fungal guild designations revealed that  
638 there was barely any effect of genotype on the relative abundance of fungal functions: the effect of  
639 genotype was only significant for the relative abundance of ericoid mycorrhizae in waste rock. This  
640 could be explained by the fact that plants recruit taxonomic groups in order to balance functions  
641 (Maherali and Klironomos, 2007). In other words, different genotypes may select different taxa but  
642 ultimately they select similar functions.

643 **Tree genotype and its associated microbiome could be linked to improvement of**  
644 **physicochemical properties of substrates**

645 Overall, the genotype C29 was associated with higher nutrient content in both mine substrates when  
646 compared with the control substrate. This suggests that some genotypes could be selected to improve  
647 the physicochemical properties of a broad range of substrate types. Conversely, growth of genotypes  
648 W08 and N16 generally led to less favorable physicochemical properties (i.e. lower carbon and  
649 nutrient content, lower pH in waste rock) in both mine substrates, suggesting that they are both ill-  
650 adapted for revegetation purposes. Moreover, growth of genotype C21 led to the most significant  
651 improvement of the physicochemical properties in tailings, but not in waste rock. Interestingly,  
652 genotype C21 was collected at the La Corne Mine site, which may suggest a fine scale local  
653 adaptation of this genotype that could be further investigated (Boshier *et al.*, 2015).

654 Furthermore, trends in physicochemical properties could be associated with the rhizosphere bacterial  
655 richness. Indeed, in waste rock, genotype C29 was associated with higher nutrient content and pH as  
656 well as chao1 index of alpha diversity compared to C21, which was associated with the lowest  
657 nutrient content, the lowest pH and the lowest chao1 index. These results suggest that an increase in  
658 microbial diversity can lead to improved soil health (Garbeva *et al.*, 2004). Additionally, some  
659 dominant taxa could be associated with more favorable conditions of the substrates under poplars of  
660 particular genotypes. For example, *Rhodoplanes* was previously found in the rhizosphere of rice  
661 paddy soils irrigated by acid mine drainage contaminated water and it has been suggested that they  
662 may have a beneficial ecological function to enhance soil fertility (Sun *et al.*, 2015). Interestingly, in  
663 our study, they were more abundant in the rhizosphere of genotype C23 (8%) compared to genotype  
664 W08 (4%) in waste rock, and nutrient content in the pots of genotypes C23 was also higher compared  
665 to W08, supporting the idea that they may play a role in soil health.

666 **Further studies will need to assess the degree of standing genetic variation with harsher**  
667 **treatments**

668 There was an overall effect of cutting origin on growth measurements, physicochemical properties of  
669 the substrates and abundance of some bacterial and fungal taxa in each substrate type. This effect  
670 could suggest that there may have been a fine scale adaptation of the genotypes in these novel  
671 environments due to high selective environmental pressures. Further research may better assess the  
672 effect of this fine scale adaptation on the composition of the microbiome of poplar trees in such novel  
673 environments.



674 Previous studies have shown that changes in the presence-absence or abundance of just a few  
675 microbial taxa can affect plant performance because of their broad functions (Zolla *et al.*, 2013;  
676 Henning *et al.*, 2016). In this study, it was shown that plant genotype had a significant effect on the  
677 abundance of some bacterial and fungal taxa, but there was no obvious correlation between the  
678 rhizosphere microbiome and tree growth. This may be because of the relatively lenient conditions of  
679 our treatments. Indeed, the mine substrates were amended with a peat mix to help plant growth and  
680 reduce stress caused by acidity, non-proper hydric conditions and low nutrient content. Nonetheless,  
681 tree growth measurements during the second season (shoot diameter, plant biomass and chlorophyll  
682 content) were also influenced by substrate type, showing that longer exposition to the mine substrates  
683 could amplify the effect of genotype on the rhizosphere microbiome. Further investigation involving  
684 harsher treatments, either directly on the field or with non-amended mine substrates in a greenhouse  
685 experiment, would be necessary to better assess the effect of genotype-by-environment interactions  
686 on plant performance and its associated microbiome.

## 687 **Conclusion**

688 This study has shown that balsam poplars are able to improve soil health of mine wastes in field  
689 conditions. Moreover, in greenhouse experiments we demonstrated the effect of genotype-by-  
690 environment interactions on the structure and diversity of the rhizosphere microbiome as well as the  
691 physicochemical properties of the soil. Our results highlight the influence of balsam poplar genotype  
692 in contrasting substrate types. We provided evidence that (1) balsam poplars are suitable to initiate a  
693 community of microorganisms closer to a functional vegetated ecosystem on various types of mine  
694 wastes as well as increasing soil nutrient content and improving pH; (2) substrate type has a stronger  
695 effect on rhizosphere microbial community composition than genotype; (3) nevertheless, plant  
696 genotype can act as a selective pressure in structuring rhizosphere microbial communities,  
697 particularly bacterial taxa; and (4) genotype-by-environment interactions have an impact on the  
698 physicochemical properties of substrates and the composition of the rhizosphere microbiome.

699 From a practical point of view, the selection of tree genotypes together with associated microbiomes  
700 benefitting their growth in mine wastes is a strategy that could facilitate the ecological restoration of  
701 mine sites. This study also highlights the importance of microbial criteria to assess the success of  
702 revegetation, as shown by the major changes in microbial community structure and diversity. Future  
703 research efforts should take into consideration the interdependence between host identity and  
704 associated microbiomes in forest ecosystems, in order to better understand plant-soil feedbacks as  
705 well as incorporate microbiome community ecology into mining restoration strategies. Our results  
706 contribute to the understanding of the relationships between tree genetics and the associated  
707 microbial communities and highlight the potential for host genotype-by-environment interactions to  
708 shape the composition of host-associated microbial communities. This study confirms the importance  
709 of large-scale conditions and environmental heterogeneity on driving soil microbiome assembly, but  
710 additionally validates the contribution of plant host genotype in acting as a selective pressure in the  
711 surrounding rhizosphere soil.

## 712 **5 Acknowledgements**

713 We wish to acknowledge the contribution of Janet Condie for DNA sequencing at the Illumina  
714 Sequencing Platform, National Research Council Canada-Saskatoon. We would also like to thank  
715 Éric Dussault for technical assistance provided in the collection of field samples, as well as Serge  
716 Rousseau and David Paré for their assistance with soil analyses. We are also grateful to Marie-  
717 Claude Gros-Louis for her contribution to the poplar genetic analyses and Gervais Pelletier for

718 support with the greenhouse experiment. The content of this article first appeared in the first author's  
719 master's thesis (Rheault, 2020).

## 720 **6 Author Contributions**

721 KR, DL, MG and AS contributed conception and design of the study; KR, DL and MJM contributed  
722 to acquisition of data; KR and CM performed the statistical analyses; KR, ET, CM and AS  
723 contributed to interpretation of data; KR wrote the first draft of the manuscript; CM and NI wrote  
724 sections of the manuscript. All authors contributed to manuscript revision, read and approved the  
725 submitted version.

## 726 **7 Conflict of Interest**

727 The authors declare that the research was conducted in the absence of any commercial or financial  
728 relationships that could be construed as a potential conflict of interest.

## 729 **8 Contribution to the Field**

730 Many studies have attempted to characterize the root microbiome of *Populus*. It has been shown that  
731 soil type is the main driver of microbial community assembly, since physicochemical properties  
732 influence microbial composition and functional group prevalence. However, genetic variations of the  
733 host plant are also associated with differential microbial colonization. Differentiating between the  
734 effects of soil properties and those of the host plant genotype has not been sufficiently addressed. Our  
735 results contribute to the understanding of the relationships between tree genetic background and the  
736 associated microbial communities and highlight the potential for host genotype-by-environment  
737 interactions to shape the composition of host-associated microbial communities. This study confirms  
738 the importance of large-scale conditions and environmental heterogeneity on driving soil microbiome  
739 assembly, but additionally validates the contribution of plant host genotype in acting as a selective  
740 pressure in the surrounding rhizosphere soil. Initiatives using *P. balsamifera* as a candidate for  
741 abandoned mine sites restoration may need to consider the interplay between genotype and the  
742 belowground microbiome. Further examination of microbial community dynamics over longer  
743 exposition of trees to mine substrates and other degraded lands may provide a clearer understanding  
744 of genotype-by-environment interactions. This knowledge will enable the development of more  
745 efficient and effective land reclamation strategies.

## 746 **9 Funding**

747 Financial support was provided by the Fonds de recherche du Québec - Nature et technologies  
748 (FRQNT) and the Natural Sciences and Engineering Research Council of Canada (NSERC) for  
749 student scholarships to KR. This work was also made possible through funding by the Genomics  
750 Research and Development Initiative of Canada and the Ecobiomics Project: Advancing  
751 Metagenomics Assessment of Soil Health and Freshwater Quality  
752 (<https://doi.org/10.1016/j.scitotenv.2019.135906>).

## 753 **10 References**

754 Abarenkov, K., Henrik Nilsson, R., Larsson, K.-H., Alexander, I. J., Eberhardt, U., Erland, S., *et al.*  
755 (2010). The UNITE database for molecular identification of fungi – recent updates and future  
756 perspectives. *New Phytol.* 186, 281–285. doi:10.1111/j.1469-8137.2009.03160.x.

- 757 Badri, D. V., Quintana, N., El Kassis, E. G., Kim, H. K., Choi, Y. H., Sugiyama, A., *et al.* (2009). An  
758 ABC transporter mutation alters root exudation of phytochemicals that provoke an overhaul of  
759 natural soil microbiota. *Plant Physiol.* 151, 2006–2017. doi:10.1104/pp.109.147462.
- 760 Bokulich, N. A., Subramanian, S., Faith, J. J., Gevers, D., Gordon, J. I., Knight, R., *et al.* (2013).  
761 Quality-filtering vastly improves diversity estimates from Illumina amplicon sequencing. *Nat.*  
762 *Methods* 10, 57–59. doi:10.1038/nmeth.2276.
- 763 Bonito, G., Benucci, G. M. N., Hameed, K., Weighill, D., Jones, P., Chen, K.-H., *et al.* (2019).  
764 Fungal-bacterial networks in the *Populus* rhizobiome are impacted by soil properties and host  
765 genotype. *Front. Microbiol.* 10, 481. doi:10.3389/fmicb.2019.00481.
- 766 Bonito, G., Reynolds, H., Robeson, M. S., Nelson, J., Hodkinson, B. P., Tuskan, G., *et al.* (2014).  
767 Plant host and soil origin influence fungal and bacterial assemblages in the roots of woody  
768 plants. *Mol. Ecol.* 23, 3356–3370. doi:10.1111/mec.12821.
- 769 Boshier, D., Broadhurst, L., Cornelius, J., Gallo, L., Koskela, J., Loo, J., *et al.* (2015). Is local best?  
770 Examining the evidence for local adaptation in trees and its scale. *Environ. Evid.* 4.  
771 doi:10.1186/s13750-015-0046-3.
- 772 Braatne, J. H., Rood, S. B., and Heilman, P. E. (1996). “Life history, ecology, and conservation of  
773 riparian cottonwoods in North America,” in *Biology of Populus and its Implications for*  
774 *Management and Conservation* (Ottawa: NRC Research Press), 57–85.  
775 doi:10.1139/9780660165066.
- 776 Bulgarelli, D., Schlaeppi, K., Spaepen, S., van Themaat, E. V. L., and Schulze-Lefert, P. (2013).  
777 Structure and functions of the bacterial microbiota of plants. *Annu. Rev. Plant Biol.* 64, 807–  
778 838. doi:10.1146/annurev-arplant-050312-120106.
- 779 Bussière, B., Aubertin, M., Zagury, G. J., Potvin, R., and Benzaazoua, M. (2005). Principaux défis et  
780 pistes de solution pour la restauration des aires d’entreposage de rejets miniers abandonnés. in  
781 *Symposium 2005 sur l’environnement et les mines*, 1–29.
- 782 Caballero-Mellado, J., Martínez-Aguilar, L., Paredes-Valdez, G., and Estrada-de los Santos, P.  
783 (2004). *Burkholderia unamae* sp. nov., an N<sub>2</sub>-fixing rhizospheric and endophytic species. *Int. J.*  
784 *Syst. Evol. Microbiol.* 54, 1165–1172. doi:10.1099/ijs.0.02951-0.
- 785 Callender, K. L., Roy, S., Khasa, D. P., Whyte, L. G., and Greer, C. W. (2016). Actinorhizal alder  
786 phytostabilization alters microbial community dynamics in gold mine waste rock from Northern  
787 Quebec: a greenhouse study. *PLoS One* 11, e0150181. doi:10.1371/journal.pone.0150181.
- 788 Caporaso, J. G., Kuczynski, J., Stombaugh, J., Bittinger, K., Bushman, F. D., Costello, E. K., *et al.*  
789 (2010). QIIME allows analysis of high-throughput community sequencing data. *Nat. Methods* 7,  
790 335–336. doi:10.1038/nmeth.f.303.
- 791 Castro, H. F., Classen, A. T., Austin, E. E., Norby, R. J., and Schadt, C. W. (2010). Soil microbial  
792 community responses to multiple experimental climate change drivers. *Appl. Environ.*  
793 *Microbiol.* 76, 999–1007. doi:10.1128/AEM.02874-09.
- 794 Chaparro, J. M., Sheflin, A. M., Manter, D. K., and Vivanco, J. M. (2012). Manipulating the soil

- 795 microbiome to increase soil health and plant fertility. *Biol. Fertil. Soils* 48, 489–499.  
796 doi:10.1007/s00374-012-0691-4.
- 797 Chen, L., Li, J., Chen, Y., Huang, L., Hua, Z., Hu, M., *et al.* (2013). Shifts in microbial community  
798 composition and function in the acidification of a lead/zinc mine tailings. *Environ. Microbiol.*  
799 15, 2431–2444. doi:10.1111/1462-2920.12114.
- 800 Colin, Y., Nicolitch, O., Van Nostrand, J. D., Zhou, J. Z., Turpault, M. P., and Uroz, S. (2017).  
801 Taxonomic and functional shifts in the beech rhizosphere microbiome across a natural soil  
802 toposequence. *Sci. Rep.* 7, 9604. doi:10.1038/s41598-017-07639-1.
- 803 Cregger, M. A., Veach, A. M., Yang, Z. K., Crouch, M. J., Vilgalys, R., Tuskan, G. A., *et al.* (2018).  
804 The *Populus* holobiont: dissecting the effects of plant niches and genotype on the microbiome.  
805 *Microbiome* 6, 31. doi:10.1186/s40168-018-0413-8.
- 806 da Rocha, U. N., Plugge, C. M., George, I., van Elsas, J. D., and van Overbeek, L. S. (2013). The  
807 rhizosphere selects for particular groups of *Acidobacteria* and *Verrucomicrobia*. *PLoS One* 8,  
808 e82443. doi:10.1371/journal.pone.0082443.
- 809 Dai, Z., Guo, X., Yin, H., Liang, Y., Cong, J., and Liu, X. (2014). Identification of nitrogen-fixing  
810 genes and gene clusters from metagenomic library of acid mine drainage. *PLoS One* 9, e87976.  
811 doi:10.1371/journal.pone.0087976.
- 812 Danielsen, L., Thürmer, A., Meinicke, P., Buée, M., Morin, E., Martin, F., *et al.* (2012). Fungal soil  
813 communities in a young transgenic poplar plantation form a rich reservoir for fungal root  
814 communities. *Ecol. Evol.* 2, 1935–1948. doi:10.1002/ece3.305.
- 815 Dickmann, D. I., and Kuzovkina, J. (2014). “Poplars and willows of the world, with emphasis on  
816 silviculturally important species,” in *Poplars and willows: Trees for society and the*  
817 *environment* (Wallingford: CAB International and Food and Agriculture Organization of the  
818 United Nations), 8–91. doi:10.1079/9781780641089.0008.
- 819 Ding, Q., Liang, Y., Legendre, P., He, X., Pei, K., Du, X., *et al.* (2011). Diversity and composition of  
820 ectomycorrhizal community on seedling roots: the role of host preference and soil origin.  
821 *Mycorrhiza* 21, 669–680. doi:10.1007/s00572-011-0374-2.
- 822 Edgar, R. C. (2010). Search and clustering orders of magnitude faster than BLAST. *Bioinformatics*  
823 26, 2460–2461. doi:10.1093/bioinformatics/btq461.
- 824 Edgar, R. C. (2013). UPARSE: Highly accurate OTU sequences from microbial amplicon reads. *Nat.*  
825 *Methods* 10, 996–998. doi:10.1038/nmeth.2604.
- 826 Fierer, N., Bradford, M. A., and Jackson, R. B. (2007). Toward an ecological classification of soil  
827 bacteria. *Ecology* 88, 1354–1364. doi:10.1890/05-1839.
- 828 Fini, A., Tattini, M., and Esteban, R. (2017). Editorial: Plants’ responses to novel environmental  
829 pressures. *Front. Plant Sci.* 8. doi:10.3389/fpls.2017.02000.
- 830 Gallart, M., Adair, K. L., Love, J., Meason, D. F., Clinton, P. W., Xue, J., *et al.* (2018). Host  
831 genotype and nitrogen form shape the root microbiome of *Pinus radiata*. *Microb. Ecol.* 75, 419–



- 832 433. doi:10.1007/s00248-017-1055-2.
- 833 Garbeva, P., van Veen, J. A., and van Elsas, J. D. (2004). Microbial diversity in soil: selection of  
834 microbial populations by plant and soil type and implications for disease suppressiveness. *Annu.*  
835 *Rev. Phytopathol.* 42, 243–270. doi:10.1146/annurev.phyto.42.012604.135455.
- 836 Gaster, J., Karst, J., and Landhäusser, S. M. (2015). The role of seedling nutrient status on  
837 development of ectomycorrhizal fungal communities in two soil types following surface mining  
838 disturbance. *Pedobiologia (Jena)*. 58, 129–135. doi:10.1016/j.pedobi.2015.07.001.
- 839 Gehring, C. A., Mueller, R. C., and Whitham, T. G. (2006). Environmental and genetic effects on the  
840 formation of ectomycorrhizal and arbuscular mycorrhizal associations in cottonwoods.  
841 *Oecologia* 149, 158–164. doi:10.1007/s00442-006-0437-9.
- 842 Gottel, N. R., Castro, H. F., Kerley, M., Yang, Z., Pelletier, D. A., Podar, M., *et al.* (2011). Distinct  
843 microbial communities within the endosphere and rhizosphere of *Populus deltoides* roots across  
844 contrasting soil types. *Appl. Environ. Microbiol.* 77, 5934–5944. doi:10.1128/aem.05255-11.
- 845 Gregorich, E. G., and Carter, M. R. (2007). *Soil sampling and methods of analysis*. 2nd ed. Boca  
846 Raton: CRC Press.
- 847 Harrison Jr, A. P. (1981). *Acidiphilium cryptum* gen. nov., sp. nov., heterotrophic bacterium from  
848 acidic mineral environments. *Int. J. Syst. Bacteriol.* 31, 327–332. doi:10.1099/00207713-31-3-  
849 327.
- 850 Henning, J. A., Weston, D. J., Pelletier, D. A., Timm, C. M., Jawdy, S. S., and Classen, A. T. (2016).  
851 Root bacterial endophytes alter plant phenotype, but not physiology. *PeerJ* 4, e2606.  
852 doi:10.7717/peerj.2606.
- 853 Hippe, H. (2000). *Leptospirillum* gen. nov.(ex Markosyan 1972), nom. rev., including *Leptospirillum*  
854 *ferrooxidans* sp. nov.(ex Markosyan 1972), nom. rev. and *Leptospirillum thermoferrooxidans*  
855 sp. nov.(Golovacheva *et al.* 1992). *Int. J. Syst. Evol. Microbiol.* 50, 501–503.  
856 doi:10.1099/00207713-50-2-501.
- 857 Hottenstein, J. D., Neilson, J. W., Gil-Loaiza, J., Root, R. A., White, S. A., Chorover, J., *et al.*  
858 (2019). Soil microbiome dynamics during pyritic mine tailing phytostabilization: understanding  
859 microbial bioindicators of soil acidification. *Front. Microbiol.* 10, 1211.  
860 doi:10.3389/fmicb.2019.01211.
- 861 Hubbard, C. J., Brock, M. T., van Diepen, L. T., Maignien, L., Ewers, B. E., and Weinig, C. (2018).  
862 The plant circadian clock influences rhizosphere community structure and function. *ISME J.* 12,  
863 400–410. doi:10.1038/ismej.2017.172.
- 864 Hujšlová, M., and Gryndler, M. (2019). “Fungi in biofilms of highly acidic soils,” in *Fungi in*  
865 *Extreme Environments: Ecological Role and Biotechnological Significance* (Cham: Springer  
866 International Publishing), 185–203. doi:10.1007/978-3-030-19030-9\_11.
- 867 Hujšlová, M., Kubátová, A., Kostovčík, M., and Kolařík, M. (2013). *Acidiella bohémica* gen. et sp.  
868 nov. and *Acidomyces* spp. (Teratosphaeriaceae), the indigenous inhabitants of extremely acidic  
869 soils in Europe. *Fungal Divers.* 58, 33–45. doi:10.1007/s13225-012-0176-7.

- 870 Illumina (2013). 16S metagenomic sequencing library preparation. Available at:  
871 [https://support.illumina.com/content/dam/illumina-](https://support.illumina.com/content/dam/illumina-support/documents/documentation/chemistry_documentation/16s/16s-metagenomic-library-prep-guide-15044223-b.pdf)  
872 [support/documents/documentation/chemistry\\_documentation/16s/16s-metagenomic-library-](https://support.illumina.com/content/dam/illumina-support/documents/documentation/chemistry_documentation/16s/16s-metagenomic-library-prep-guide-15044223-b.pdf)  
873 [prep-guide-15044223-b.pdf](https://support.illumina.com/content/dam/illumina-support/documents/documentation/chemistry_documentation/16s/16s-metagenomic-library-prep-guide-15044223-b.pdf) [Accessed October 22, 2019].
- 874 Jeanbille, M., Buée, M., Bach, C., Cébron, A., Frey-Klett, P., Turpault, M. P., *et al.* (2016). Soil  
875 parameters drive the structure, diversity and metabolic potentials of the bacterial communities  
876 across temperate beech forest soil sequences. *Microb. Ecol.* 71, 482–493. doi:10.1007/s00248-  
877 015-0669-5.
- 878 Johnson, D. W., Lindberg, S. E., and Pitelka, L. F. (1992). *Atmospheric deposition and forest*  
879 *nutrient cycling: a synthesis of the integrated forest study.*, eds. J. Dale W. and L. Steven E.  
880 Springer New York.
- 881 Katanić, M., Orlović, S., Grebenc, T., Kovačević, B., Kebert, M., Matavulj, M., *et al.* (2015).  
882 Mycorrhizal fungal community of poplars growing on pyrite tailings contaminated site near the  
883 river Timok. *South-east Eur. For.* 6, 53–63. doi:10.15177/seefor.14-18.
- 884 Kennedy, K., Hall, M. W., Lynch, M. D. J., Moreno-Hagelsieb, G., and Neufeld, J. D. (2014).  
885 Evaluating bias of Illumina-based bacterial 16S rRNA gene profiles. *Appl. Environ. Microbiol.*  
886 80, 5717–5722. doi:10.1128/AEM.01451-14.
- 887 Kumaresan, D., Cross, A. T., Moreira-Grez, B., Kariman, K., Nevill, P., Stevens, J., *et al.* (2017).  
888 Microbial functional capacity is preserved within engineered soil formulations used in mine site  
889 restoration. *Sci. Rep.* 7, 564. doi:10.1038/s41598-017-00650-6.
- 890 Lauber, C. L., Hamady, M., Knight, R., and Fierer, N. (2009). Pyrosequencing-based assessment of  
891 soil pH as a predictor of soil bacterial community structure at the continental scale. *Appl.*  
892 *Environ. Microbiol.* 75, 5111–5120. doi:10.1128/AEM.00335-09.
- 893 Lebeis, S. L., Paredes, S. H., Lundberg, D. S., Breakfield, N., Gehring, J., McDonald, M., *et al.*  
894 (2015). Salicylic acid modulates colonization of the root microbiome by specific bacterial taxa.  
895 *Science (80- )*. 349, 860–864. doi:10.1126/science.aaa8764.
- 896 Li, X., Bond, P. L., Van Nostrand, J. D., Zhou, J., and Huang, L. (2015). From lithotroph- to  
897 organotroph-dominant: directional shift of microbial community in sulphidic tailings during  
898 phytostabilization. *Sci. Rep.* 5, 12978. doi:10.1038/srep12978.
- 899 Li, Y., Jia, Z., Sun, Q., Zhan, J., Yang, Y., and Wang, D. (2016). Ecological restoration alters  
900 microbial communities in mine tailings profiles. *Sci. Rep.* 6, 25193. doi:10.1038/srep25193.
- 901 Lin, Y., Gifford, S., Ducklow, H., Schofield, O., and Cassara, N. (2019). Towards quantitative  
902 microbiome community profiling using internal standards. *Appl. Environ. Microbiol.* 85,  
903 e02634-18. doi:10.1128/AEM.02634-18.
- 904 Madhaiyan, M., Poonguzhali, S., Senthilkumar, M., Pragatheswari, D., Lee, J.-S., and Lee, K.-C.  
905 (2015). *Arachidococcus rhizosphaerae* gen. nov., sp. nov., a plant-growth-promoting bacterium  
906 in the family *Chitinophagaceae* isolated from rhizosphere soil. *Int. J. Syst. Evol. Microbiol.* 65,  
907 578–586. doi:10.1099/ijs.0.069377-0.

- 908 Maherali, H., and Klironomos, J. N. (2007). Influence of phylogeny on fungal community assembly  
909 and ecosystem functioning. *Science* (80-. ). 316, 1746–1748. doi:10.1126/science.1143082.
- 910 Marschner, P., Crowley, D., and Yang, C. H. (2004). Development of specific rhizosphere bacterial  
911 communities in relation to plant species, nutrition and soil type. *Plant Soil* 261, 199–208.  
912 doi:10.1023/B:PLSO.0000035569.80747.c5.
- 913 McBride, M. J., Liu, W., Lu, X., Zhu, Y., and Zhang, W. (2014). “The family *Cytophagaceae*,” in  
914 *The Prokaryotes: Other Major Lineages of Bacteria and The Archaea* (Heidelberg: Springer  
915 Berlin), 577–593. doi:10.1007/978-3-642-38954-2\_382.
- 916 McDonald, D., Price, M. N., Goodrich, J., Nawrocki, E. P., DeSantis, T. Z., Probst, A., *et al.* (2012).  
917 An improved Greengenes taxonomy with explicit ranks for ecological and evolutionary analyses  
918 of bacteria and archaea. *ISME J.* 6, 610–618. doi:10.1038/ismej.2011.139.
- 919 Mehnaz, S., Kowalik, T., Reynolds, B., and Lazarovits, G. (2010). Growth promoting effects of corn  
920 (*Zea mays*) bacterial isolates under greenhouse and field conditions. *Soil Biol. Biochem.* 42,  
921 1848–1856. doi:10.1016/j.soilbio.2010.07.003.
- 922 Meirmans, P. G., Godbout, J., Lamothe, M., Thompson, S. L., and Isabel, N. (2017). History rather  
923 than hybridization determines population structure and adaptation in *Populus balsamifera*. *J.*  
924 *Evol. Biol.* 30, 2044–2058. doi:10.1111/jeb.13174.
- 925 Mendez, M. O., and Maier, R. M. (2008). Phytoremediation of mine tailings in temperate and arid  
926 environments. *Rev. Environ. Sci. Biotechnol.* 7, 47–59. doi:10.1007/s11157-007-9125-4.
- 927 Mosier, A. C., Miller, C. S., Frischkorn, K. R., Ohm, R. A., Li, Z., LaButti, K., *et al.* (2016). Fungi  
928 contribute critical but spatially varying roles in nitrogen and carbon cycling in acid mine  
929 drainage. *Front. Microbiol.* 7, 238. doi:10.3389/fmicb.2016.00238.
- 930 Oksanen, J., Blanchet, F. G., Friendly, M., Kindt, R., Legendre, P., McGlenn, D., *et al.* (2019).  
931 Ordination methods, diversity analysis and other functions for community and vegetation  
932 ecologists (vegan: community ecology package version 2.5-6). 296. Available at:  
933 <https://github.com/vegandevs/vegan>.
- 934 Parada, A. E., Needham, D. M., and Fuhrman, J. A. (2016). Every base matters: assessing small  
935 subunit rRNA primers for marine microbiomes with mock communities, time series and global  
936 field samples. *Environ. Microbiol.* 18, 1403–1414. doi:10.1111/1462-2920.13023.
- 937 Pardon, P., Reubens, B., Reheul, D., Mertens, J., De Frenne, P., Coussement, T., *et al.* (2017). Trees  
938 increase soil organic carbon and nutrient availability in temperate agroforestry systems. *Agric.*  
939 *Ecosyst. Environ.* 247, 98–111. doi:10.1016/j.agee.2017.06.018.
- 940 Philippot, L., Raaijmakers, J. M., Lemanceau, P., and Van Der Putten, W. H. (2013). Going back to  
941 the roots: the microbial ecology of the rhizosphere. *Nat. Rev. Microbiol.* 11, 789–799.  
942 doi:10.1038/nrmicro3109.
- 943 Prach, K., and Tolvanen, A. (2016). How can we restore biodiversity and ecosystem services in  
944 mining and industrial sites? *Environ. Sci. Pollut. Res.* 23, 13587–13590. doi:10.1007/s11356-  
945 016-7113-3.

- 946 Qiao, Q., Wang, F., Zhang, J., Chen, Y., Zhang, C., Liu, G., *et al.* (2017). The variation in the  
947 rhizosphere microbiome of cotton with soil type, genotype and developmental stage. *Sci. Rep.* 7,  
948 3940. doi:10.1038/s41598-017-04213-7.
- 949 Rastogi, G., Tech, J. J., Coaker, G. L., and Leveau, J. H. J. (2010). A PCR-based toolbox for the  
950 culture-independent quantification of total bacterial abundances in plant environments. *J.*  
951 *Microbiol. Methods* 83, 127–132. doi:10.1016/j.mimet.2010.08.006.
- 952 Rivers, A. R. (2016). iTag amplicon sequencing for taxonomic identification at JGI. Available at:  
953 <https://jgi.doe.gov/wp-content/uploads/2013/05/iTagger-methods.pdf>.
- 954 Rosario, K., Iverson, S. L., Henderson, D. A., Chartrand, S., McKeon, C., Glenn, E. P., *et al.* (2007).  
955 Bacterial community changes during plant establishment at the San Pedro River mine tailings  
956 site. *J. Environ. Qual.* 36, 1249–1259. doi:10.2134/jeq2006.0315.
- 957 Rosenberg, E. (2014). “The family *Chitinophagaceae*,” in *The Prokaryotes: Other Major Lineages of*  
958 *Bacteria and The Archaea* (Springer-Verlag Berlin Heidelberg), 493–495. doi:10.1007/978-3-  
959 642-38954-2.
- 960 Santoyo, G., Moreno-Hagelsieb, G., del Carmen Orozco-Mosqueda, M., and Glick, B. R. (2016).  
961 Plant growth-promoting bacterial endophytes. *Microbiol. Res.* 183, 92–99.  
962 doi:10.1016/j.micres.2015.11.008.
- 963 Schloss, P. D., Westcott, S. L., Ryabin, T., Hall, J. R., Hartmann, M., Hollister, E. B., *et al.* (2009).  
964 Introducing mothur: open-source, platform-independent, community-supported software for  
965 describing and comparing microbial communities. *Appl. Environ. Microbiol.* 75, 7537–7541.  
966 doi:10.1128/AEM.01541-09.
- 967 Schmidt, P.-A., Bálint, M., Greshake, B., Bandow, C., Römbke, J., and Schmitt, I. (2013). Illumina  
968 metabarcoding of a soil fungal community. *Soil Biol. Biochem.* 65, 128–132.  
969 doi:10.1016/j.soilbio.2013.05.014.
- 970 Shakya, M., Gottel, N., Castro, H., Yang, Z. K., Gunter, L., Labbé, J., *et al.* (2013). A multifactor  
971 analysis of fungal and bacterial community structure in the root microbiome of mature *Populus*  
972 *deltooides* trees. *PLoS One* 8, e76382. doi:10.1371/journal.pone.0076382.
- 973 Sun, M., Xiao, T., Ning, Z., Xiao, E., and Sun, W. (2015). Microbial community analysis in rice  
974 paddy soils irrigated by acid mine drainage contaminated water. *Appl. Microbiol. Biotechnol.*  
975 99, 2911–2922. doi:10.1007/s00253-014-6194-5.
- 976 Tedersoo, L., Bahram, M., Põlme, S., Kõljalg, U., Yorou, N. S., Wijesundera, R., *et al.* (2014).  
977 Global diversity and geography of soil fungi. *Science (80-. )*. 346, 1256688.  
978 doi:10.1126/science.1256688.
- 979 Tilman, D., Reich, P. B., and Knops, J. M. H. (2006). Biodiversity and ecosystem stability in a  
980 decade-long grassland experiment. *Nature* 441, 629–632. doi:10.1038/nature04742.
- 981 Tordoff, G. M., Baker, A. J. M., and Willis, A. J. (2000). Current approaches to the revegetation and  
982 reclamation of metalliferous mine wastes. *Chemosphere* 41, 219–228. doi:10.1016/S0045-  
983 6535(99)00414-2.



- 984 Turlousse, D. M., Yoshiike, S., Ohashi, A., Matsukura, S., Noda, N., and Sekiguchi, Y. (2017).  
985 Synthetic spike-in standards for high-throughput 16S rRNA gene amplicon sequencing. *Nucleic*  
986 *Acids Res.* 45, e23. doi:10.1093/nar/gkw984.
- 987 Tuskan, G. A., DiFazio, S., Jansson, S., Bohlmann, J., Grigoriev, I., Hellsten, U., *et al.* (2006). The  
988 genome of black cottonwood, *Populus trichocarpa* (Torr. & Gray). *Science* (80-. ). 313, 1596–  
989 1604. doi:10.1126/science.1128691.
- 990 van Haveren, B. P., and Cooper, D. J. (1992). Rehabilitation potential of riparian systems disturbed  
991 by placer mining in interior Alaska. in *Proceedings of the 1992 National Meeting of the*  
992 *American Society for Surface Mining and Reclamation* (Duluth), 657–663.  
993 doi:10.21000/JASMR92010657.
- 994 Veach, A. M., Morris, R., Yip, D. Z., Yang, Z. K., Engle, N. L., Cregger, M. A., *et al.* (2019).  
995 Rhizosphere microbiomes diverge among *Populus trichocarpa* plant-host genotypes and  
996 chemotypes, but it depends on soil origin. *Microbiome* 7, 76. doi:10.1186/s40168-019-0668-8.
- 997 Wagner, M. R., Lundberg, D. S., del Rio, T. G., Tringe, S. G., Dangl, J. L., and Mitchell-Olds, T.  
998 (2016). Host genotype and age shape the leaf and root microbiomes of a wild perennial plant.  
999 *Nat. Commun.* 7, 12151. doi:10.1038/ncomms12151.
- 1000 Webb, H. K., Ng, H. J., and Ivanova, E. P. (2014). “The family *Methylocystaceae*,” in *The*  
1001 *Prokaryotes: Alphaproteobacteria and Betaproteobacteria* (Heidelberg: Springer Berlin), 341–  
1002 347. doi:10.1007/978-3-642-30197-1\_254.
- 1003 White, T. J., Bruns, T. D., Lee, S. B., and Taylor, J. W. (1990). “Amplification and direct sequencing  
1004 of fungal ribosomal RNA genes for phylogenetics,” in *PCR protocols: a guide to methods and*  
1005 *applications* (San Diego: Academic Press), 315–322. doi:10.1016/b978-0-12-372180-8.50042-  
1006 1.
- 1007 Wilkins, M. J., Williams, K. H., Verberkmoes, N. C., Hettich, R. L., Lipton, M. S., Callister, S. J., *et*  
1008 *al.* (2008). Proteogenomic analysis of *Geobacter* populations in a low nutrient contaminated  
1009 aquifer under stimulated conditions. *Am. Geophys. Union, Fall Meet. Abstr.* Available at:  
1010 <http://adsabs.harvard.edu/abs/2008AGUFM.B33C0445W> [Accessed October 22, 2019].
- 1011 Wong, M. H. (1981). Environmental impacts of iron ore tailings—The case of Tolo Harbour, Hong  
1012 Kong. *Environ. Manage.* 5, 135–145. doi:10.1007/BF01867333.
- 1013 Wu, W., Wu, J., Liu, X., Chen, X., Wu, Y., and Yu, S. (2017). Inorganic phosphorus fertilizer  
1014 ameliorates maize growth by reducing metal uptake, improving soil enzyme activity and  
1015 microbial community structure. *Ecotoxicol. Environ. Saf.* 143, 322–329.  
1016 doi:10.1016/j.ecoenv.2017.05.039.
- 1017 Xue, C., Penton, C. R., Shen, Z., Zhang, R., Huang, Q., Li, R., *et al.* (2015). Manipulating the banana  
1018 rhizosphere microbiome for biological control of Panama disease. *Sci. Rep.* 5, 11124.  
1019 doi:10.1038/srep11124.
- 1020 Zhang, Z., Qu, Y., Li, S., Feng, K., Wang, S., Cai, W., *et al.* (2017). Soil bacterial quantification  
1021 approaches coupling with relative abundances reflecting the changes of taxa. *Sci. Rep.* 7, 4837.  
1022 doi:10.1038/s41598-017-05260-w.

1023 Zolla, G., Badri, D. V., Bakker, M. G., Manter, D. K., and Vivanco, J. M. (2013). Soil microbiomes  
1024 vary in their ability to confer drought tolerance to *Arabidopsis*. *Appl. Soil Ecol.* 68, 1–9.  
1025 doi:10.1016/j.apsoil.2013.03.007.

1026 **11 Data Availability Statement**

1027 The Illumina data generated in this study was deposited in the NCBI Sequence Read Archive and is  
1028 available under the project number PRJNA615167.

1029

1030

1031 **12 Tables**

1032 **Table 1.** Physicochemical properties of substrates from the field. Legend: CEC: Cation exchange  
 1033 capacity; BCSR: Base cation saturation ratio. Significant differences are highlighted in bold.

1034

|                                  | Reference forest soil | Westwood   |           |                | La Corne Mine |           |                |
|----------------------------------|-----------------------|------------|-----------|----------------|---------------|-----------|----------------|
|                                  |                       | Waste rock | Vegetated | p-value        | Tailings      | Vegetated | p-value        |
| <b>C total (%)</b>               | 6.218                 | 0.084      | 0.863     | <b>0.002</b>   | 0.042         | 2.983     | < <b>0.001</b> |
| <b>N total (%)</b>               | 0.253                 | < 0.006    | 0.021     | 0.053          | < 0.006       | 0.106     | < <b>0.001</b> |
| <b>S total (%)</b>               | 0.045                 | 0.700      | 0.134     | < <b>0.001</b> | 0.017         | 0.030     | 0.091          |
| <b>pH</b>                        | 4.9                   | 2.8        | 4.7       | < <b>0.001</b> | 6.4           | 4.5       | < <b>0.001</b> |
| <b>P (mg/kg)</b>                 | 9.83                  | 7.02       | 23.98     | < <b>0.001</b> | 0.68          | 3.80      | <b>0.004</b>   |
| <b>K (cmol<sub>c</sub>/kg)</b>   | 0.418                 | 0.011      | 0.199     | < <b>0.001</b> | 0.053         | 0.202     | < <b>0.001</b> |
| <b>Ca (cmol<sub>c</sub>/kg)</b>  | 7.69                  | 8.96       | 1.80      | 0.069          | 0.43          | 2.93      | < <b>0.001</b> |
| <b>Mg (cmol<sub>c</sub>/kg)</b>  | 1.590                 | 0.564      | 0.676     | 0.413          | 0.272         | 0.902     | < <b>0.001</b> |
| <b>Mn (cmol<sub>c</sub>/kg)</b>  | 0.143                 | 0.011      | 0.040     | <b>0.024</b>   | 0.024         | 0.073     | <b>0.003</b>   |
| <b>Fe (cmol<sub>c</sub>/kg)</b>  | 2.00                  | 6.26       | 2.68      | < <b>0.001</b> | 2.85          | 3.10      | 0.550          |
| <b>Na (cmol<sub>c</sub>/kg)</b>  | 0.035                 | 0.022      | 0.021     | 0.805          | 0.028         | 0.029     | 0.929          |
| <b>CEC (cmol<sub>c</sub>/kg)</b> | 13.6                  | 17.0       | 8.7       | 0.102          | 5.3           | 9.4       | <b>0.003</b>   |
| <b>BCSR</b>                      | 71.6                  | 46.3       | 31.3      | 0.344          | 14.1          | 43.2      | < <b>0.001</b> |

1035

1036

## Tree Genotype Impacts Rhizosphere Microbiomes

1037 **Table 2.** Physicochemical properties of substrates after the greenhouse experiment. See  
 1038 Supplementary Table 5 for the other parameters.

1039

|                | C total (%) |          |            | N total (‰) |          |            | P (mg/kg) |          |            |
|----------------|-------------|----------|------------|-------------|----------|------------|-----------|----------|------------|
|                | Control     | Tailings | Waste rock | Control     | Tailings | Waste rock | Control   | Tailings | Waste rock |
| <b>W08</b>     | 9.43 ab     | 1.47 b   | 2.50 abc   | 17.8 ab     | 0.35 c   | 3.09 bcd   | 15.7 b    | 2.43     | 6.2 b      |
| <b>W09</b>     | 8.23 ab     | 1.63 ab  | 2.56 ab    | 17.1 ab     | 0.52 c   | 3.98 abc   | 30.9 ab   | 4.12     | 10.9 a     |
| <b>W10</b>     | 6.08 b      | 1.93 ab  | 2.55 abc   | 11.7 b      | 1.16 bc  | 3.19 bcd   | 38.0 a    | 6.11     | 12.6 a     |
| <b>W13</b>     | 10.96 a     | 1.83 ab  | 3.21 a     | 22.2 a      | 0.98 bc  | 4.87 ab    | 34.6 ab   | 7.10     | 10.9 a     |
| <b>N16</b>     | 10.24 ab    | 2.21 ab  | 2.25 bc    | 21.8 ab     | 1.87 abc | 2.74 cd    | 27.6 ab   | 5.07     | 11.1 a     |
| <b>C21</b>     | 10.02 ab    | 2.19 a   | 1.79 c     | 19.3 ab     | 1.91 abc | 1.32 d     | 33.0 ab   | 5.14     | 9.2 ab     |
| <b>C23</b>     | 7.60 ab     | 2.05 ab  | 2.61 abc   | 13.9 ab     | 1.22 bc  | 3.50 abc   | 37.9 a    | 6.06     | 11.5 a     |
| <b>C25</b>     | 7.81 ab     | 2.14 a   | 2.21 bc    | 15.6 ab     | 1.47 bc  | 4.39 abc   | 35.2 a    | 3.96     | 11.9 a     |
| <b>C29</b>     | 10.59 a     | 1.95 ab  | 2.71 ab    | 21.1 a      | 3.22 a   | 5.39 a     | 37.3 a    | 7.07     | 11.9 a     |
| <b>N33</b>     | 7.16 ab     | 1.59 ab  | 2.22 bc    | 14.3 ab     | 2.50 ab  | 4.29 abc   | 29.8 ab   | 2.68     | 10.5 a     |
| <b>p-value</b> | 0.009       | 0.006    | 0.002      | 0.009       | < 0.001  | < 0.001    | 0.017     | 0.027    | < 0.001    |

1040

|                | K (cmol/kg) |          |            | Ca (cmol/kg) |          |            | Mg (cmol/kg) |          |            |
|----------------|-------------|----------|------------|--------------|----------|------------|--------------|----------|------------|
|                | Control     | Tailings | Waste rock | Control      | Tailings | Waste rock | Control      | Tailings | Waste rock |
| <b>W08</b>     | 4.42 cd     | 1.14 b   | 2.16       | 9.20 c       | 1.40 b   | 3.56 c     | 3.97         | 0.64 b   | 0.86 ab    |
| <b>W09</b>     | 9.61 abcd   | 1.60 ab  | 2.20       | 24.80 a      | 2.85 ab  | 5.93 ab    | 7.07         | 1.12 a   | 1.28 a     |
| <b>W10</b>     | 11.06 a     | 2.59 ab  | 2.00       | 21.50 abc    | 3.45 a   | 5.46 abc   | 6.43         | 1.45 a   | 1.12 ab    |
| <b>W13</b>     | 8.75 bc     | 1.88 ab  | 2.00       | 23.90 ab     | 3.49 a   | 6.47 ab    | 7.26         | 1.30 a   | 1.28 a     |
| <b>N16</b>     | 7.56 d      | 2.22 ab  | 1.67       | 20.00 abc    | 4.66 a   | 4.66 abc   | 6.49         | 1.62 a   | 1.18 ab    |
| <b>C21</b>     | 9.07 abcd   | 2.67 a   | 1.37       | 19.50 abc    | 4.10 a   | 3.10 c     | 6.13         | 1.45 a   | 0.67 b     |
| <b>C23</b>     | 10.11 ab    | 1.98 ab  | 1.72       | 17.60 bc     | 3.35 a   | 5.99 ab    | 5.70         | 1.22 a   | 1.24 a     |
| <b>C25</b>     | 9.35 abcd   | 2.84 a   | 1.58       | 20.90 abc    | 3.59 a   | 4.27 bc    | 6.40         | 1.46 a   | 1.01 ab    |
| <b>C29</b>     | 7.10 d      | 1.67 ab  | 2.05       | 19.70 abc    | 4.06 a   | 6.74 a     | 5.95         | 1.22 a   | 1.28 a     |
| <b>N33</b>     | 8.61 abcd   | 1.83 ab  | 1.57       | 21.10 abc    | 3.19 a   | 4.88 abc   | 5.77         | 1.24 a   | 1.06 ab    |
| <b>p-value</b> | 0.013       | 0.013    | 0.068      | 0.005        | < 0.001  | < 0.001    | 0.094        | < 0.001  | 0.003      |

1041

|                | pH      |          |            | S total (‰) |          |            | Fe (cmol/kg) |           |            |
|----------------|---------|----------|------------|-------------|----------|------------|--------------|-----------|------------|
|                | Control | Tailings | Waste rock | Control     | Tailings | Waste rock | Control      | Tailings  | Waste rock |
| <b>W08</b>     | 5.81    | 5.83     | 4.66 ab    | 1.04 ab     | 0.52     | 10.60 a    | 0.450        | 0.910 d   | 2.100      |
| <b>W09</b>     | 5.59    | 5.51     | 4.86 a     | 1.27 ab     | 0.54     | 10.30 a    | 1.054        | 1.800 ab  | 2.320      |
| <b>W10</b>     | 5.68    | 5.58     | 4.73 ab    | 0.62 ab     | 0.70     | 12.70 a    | 0.869        | 1.890 a   | 2.450      |
| <b>W13</b>     | 5.77    | 5.64     | 4.92 a     | 1.84 a      | 0.14     | 10.40 a    | 0.957        | 1.720 abc | 2.170      |
| <b>N16</b>     | 5.64    | 6.03     | 4.84 a     | 1.21 ab     | 0.05     | 10.20 a    | 0.813        | 1.220 cd  | 2.130      |
| <b>C21</b>     | 5.39    | 5.61     | 4.32 b     | 1.03 ab     | 0.89     | 11.20 a    | 0.922        | 1.420 bc  | 2.660      |
| <b>C23</b>     | 5.63    | 5.64     | 4.83 a     | 1.19 ab     | 0.48     | 3.40 b     | 1.089        | 1.580 abc | 2.700      |
| <b>C25</b>     | 5.65    | 5.48     | 4.66 ab    | 0.30 b      | 0.11     | 3.50 b     | 1.028        | 1.430 abc | 2.140      |
| <b>C29</b>     | 5.54    | 5.62     | 4.92 a     | 0.34 b      | 0.02     | 2.60 b     | 0.973        | 1.650 abc | 2.270      |
| <b>N33</b>     | 5.44    | 5.53     | 4.75 ab    | 0.03 b      | 0.03     | 4.10 b     | 0.998        | 1.780 ab  | 2.260      |
| <b>p-value</b> | 0.282   | 0.111    | 0.015      | 0.011       | 0.684    | < 0.001    | 0.354        | < 0.001   | 0.497      |

1042

1043



1044 **13 Figures**

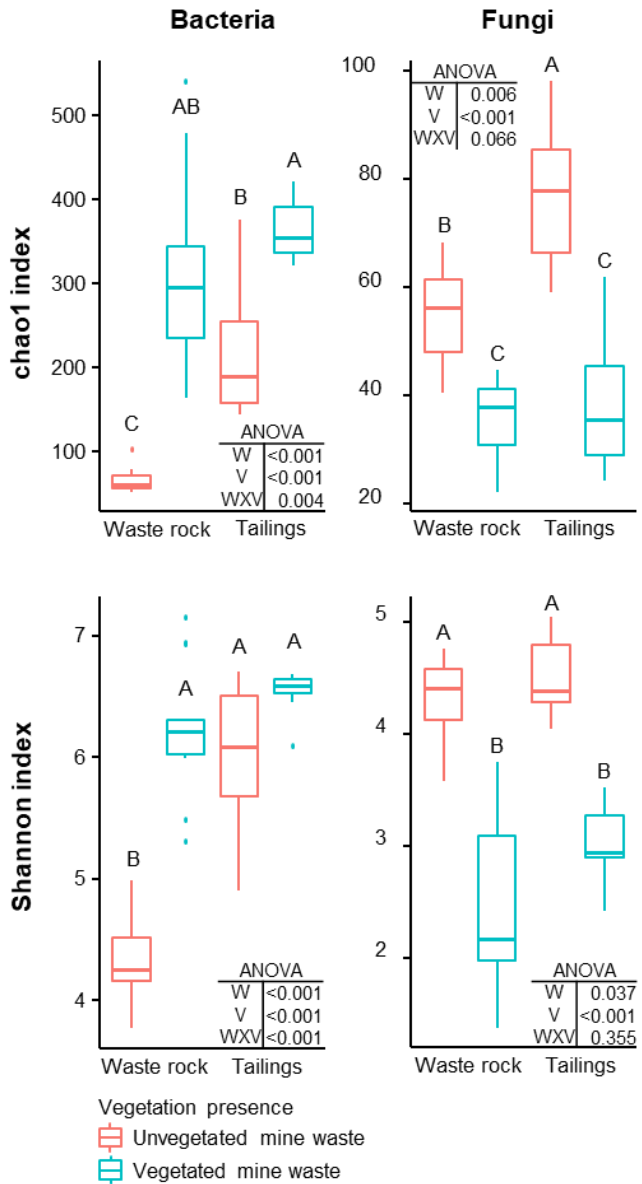

1045

1046 **Figure 1.** Alpha diversity indices of bacterial and fungal community profiles in field samples. A two-  
 1047 way ANOVA was used to discern how waste type, vegetation presence and their interaction  
 1048 influenced alpha diversity indices. In the ANOVA table, W is waste type; V is vegetation presence;  
 1049 and WXV is the interaction between waste type and vegetation presence. Treatments are composed  
 1050 of two factors: waste rock and tailings as waste type; and vegetated or unvegetated mine waste as  
 1051 vegetation presence. Shared letters between treatments means there is no significant difference  
 1052 between these treatments, as determined by Tukey HSD post-hoc pairwise comparison test ( $n \geq 8$ ).  
 1053 Significance level is  $p < 0.05$ .

1054

## Tree Genotype Impacts Rhizosphere Microbiomes

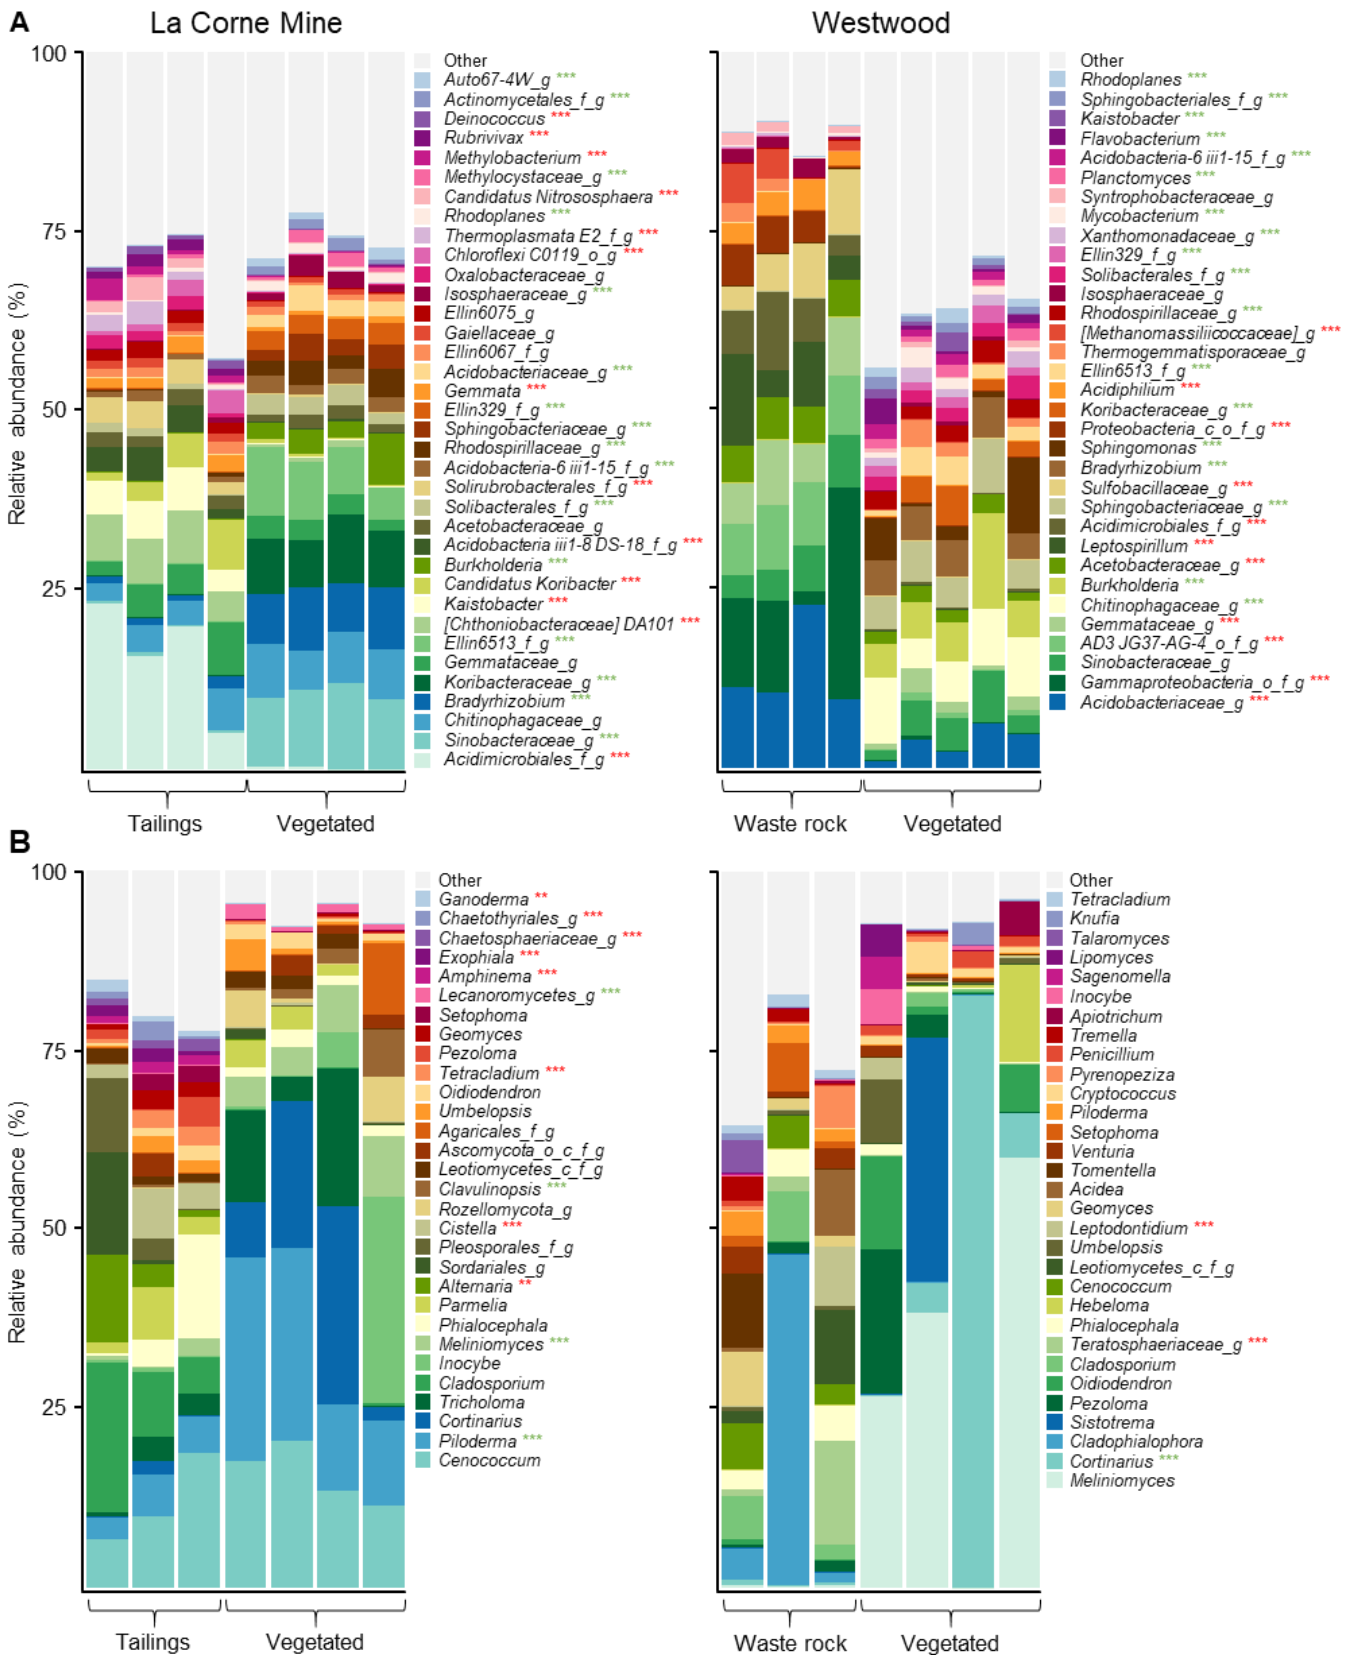

1056 **Figure 2.** Taxonomic profiles of bacterial and fungal communities in vegetated and unvegetated  
1057 samples of waste rock from the Westwood site and tailings from the La Corne Mine site. Taxonomic  
1058 profiles of bacterial communities (**A**) and fungal communities (**B**) at the genus level. Only bacterial  
1059 and fungal taxa with a relative abundance >1% in at least one treatment are shown. Green and red  
1060 stars represent a significant increase and decrease, respectively, in the relative abundance of the taxa  
1061 in the vegetated soil compared to the unvegetated soil as determined by a Tukey HSD post-hoc  
1062 pairwise comparison test ( $n \geq 3$ ). Significance level is represented as follows:  $p < 0.05$  \*,  $p < 0.01$  \*\*,  
1063  $p < 0.001$  \*\*\*.

1064

## Tree Genotype Impacts Rhizosphere Microbiomes

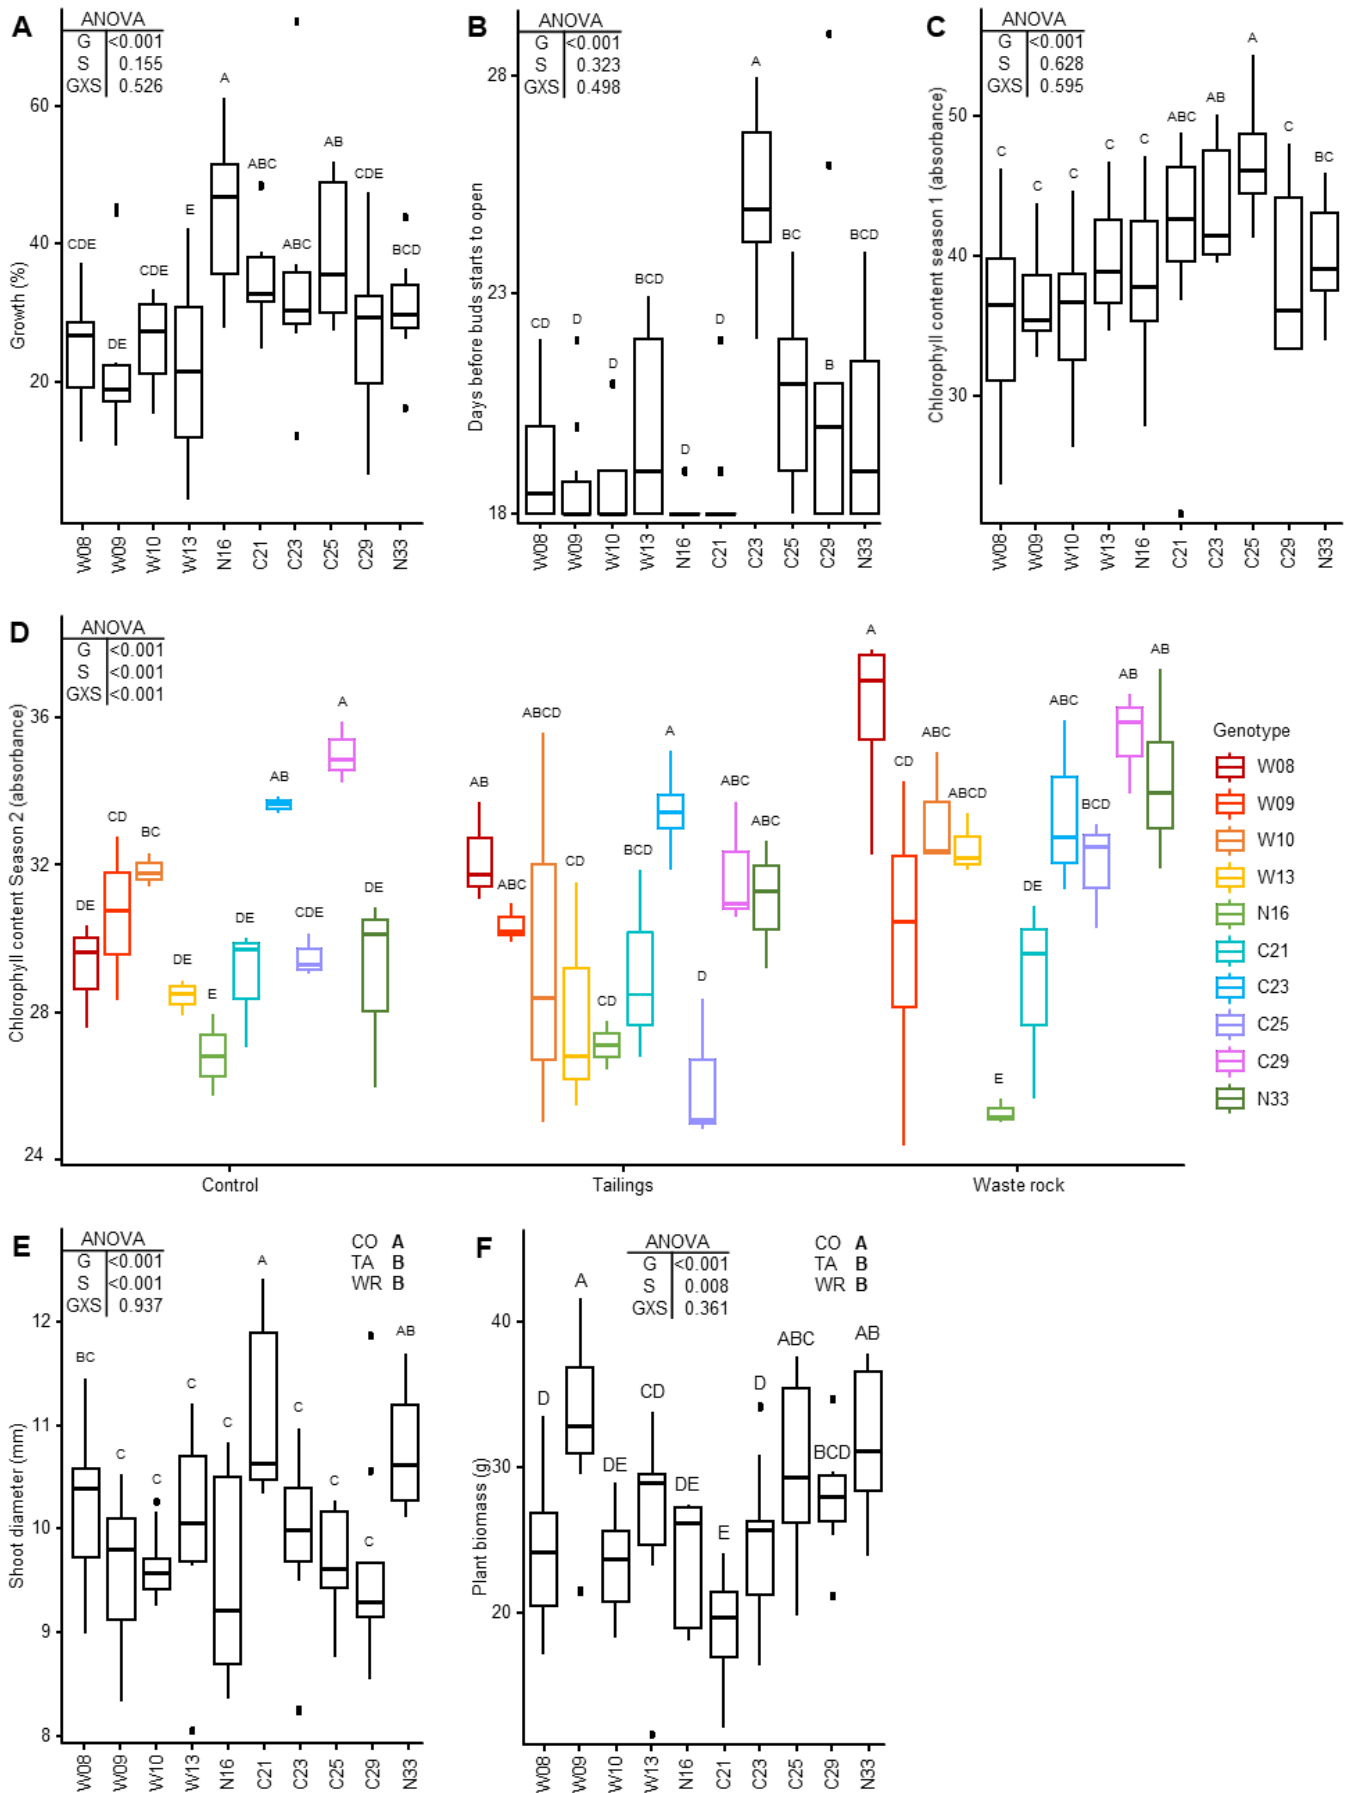



1066 **Figure 3.** Effect of genotype and substrate type on tree growth measurements. Tree growth during  
1067 the first season (**A**); chlorophyll content at the end of the first (**B**) and second (**C**) seasons; blooming  
1068 during the second season (**D**); shoot diameter (**E**); and biomass produced during the second season  
1069 (**F**). A two-way ANOVA was used to discern how genotype, substrate type and their interaction  
1070 influenced tree growth measurements. Shared letters between treatments means there is no significant  
1071 difference between these treatments as determined by Tukey HSD post-hoc pairwise comparison test  
1072 ( $n \geq 3$ ). In the ANOVA tables, G is genotype; S is substrate type; and GXS is the interaction between  
1073 genotype and substrate type. In panels (**E**) and (**F**) CO is control; TA is tailings; and WR is waste  
1074 rock. Significance level is  $p < 0.05$ . In panels (**A**), (**B**) and (**C**), because only the effect of genotype is  
1075 significant, measures from all substrate types were pooled. In panel (**D**), because the interaction of  
1076 both factors is significant, all treatments were shown separately. In panels (**E**) and (**F**), pooled  
1077 measures from all substrate types are shown for each genotype as a boxplot and the effect for each  
1078 substrate type is shown in the upper right corner of the plots.

1079

## Tree Genotype Impacts Rhizosphere Microbiomes

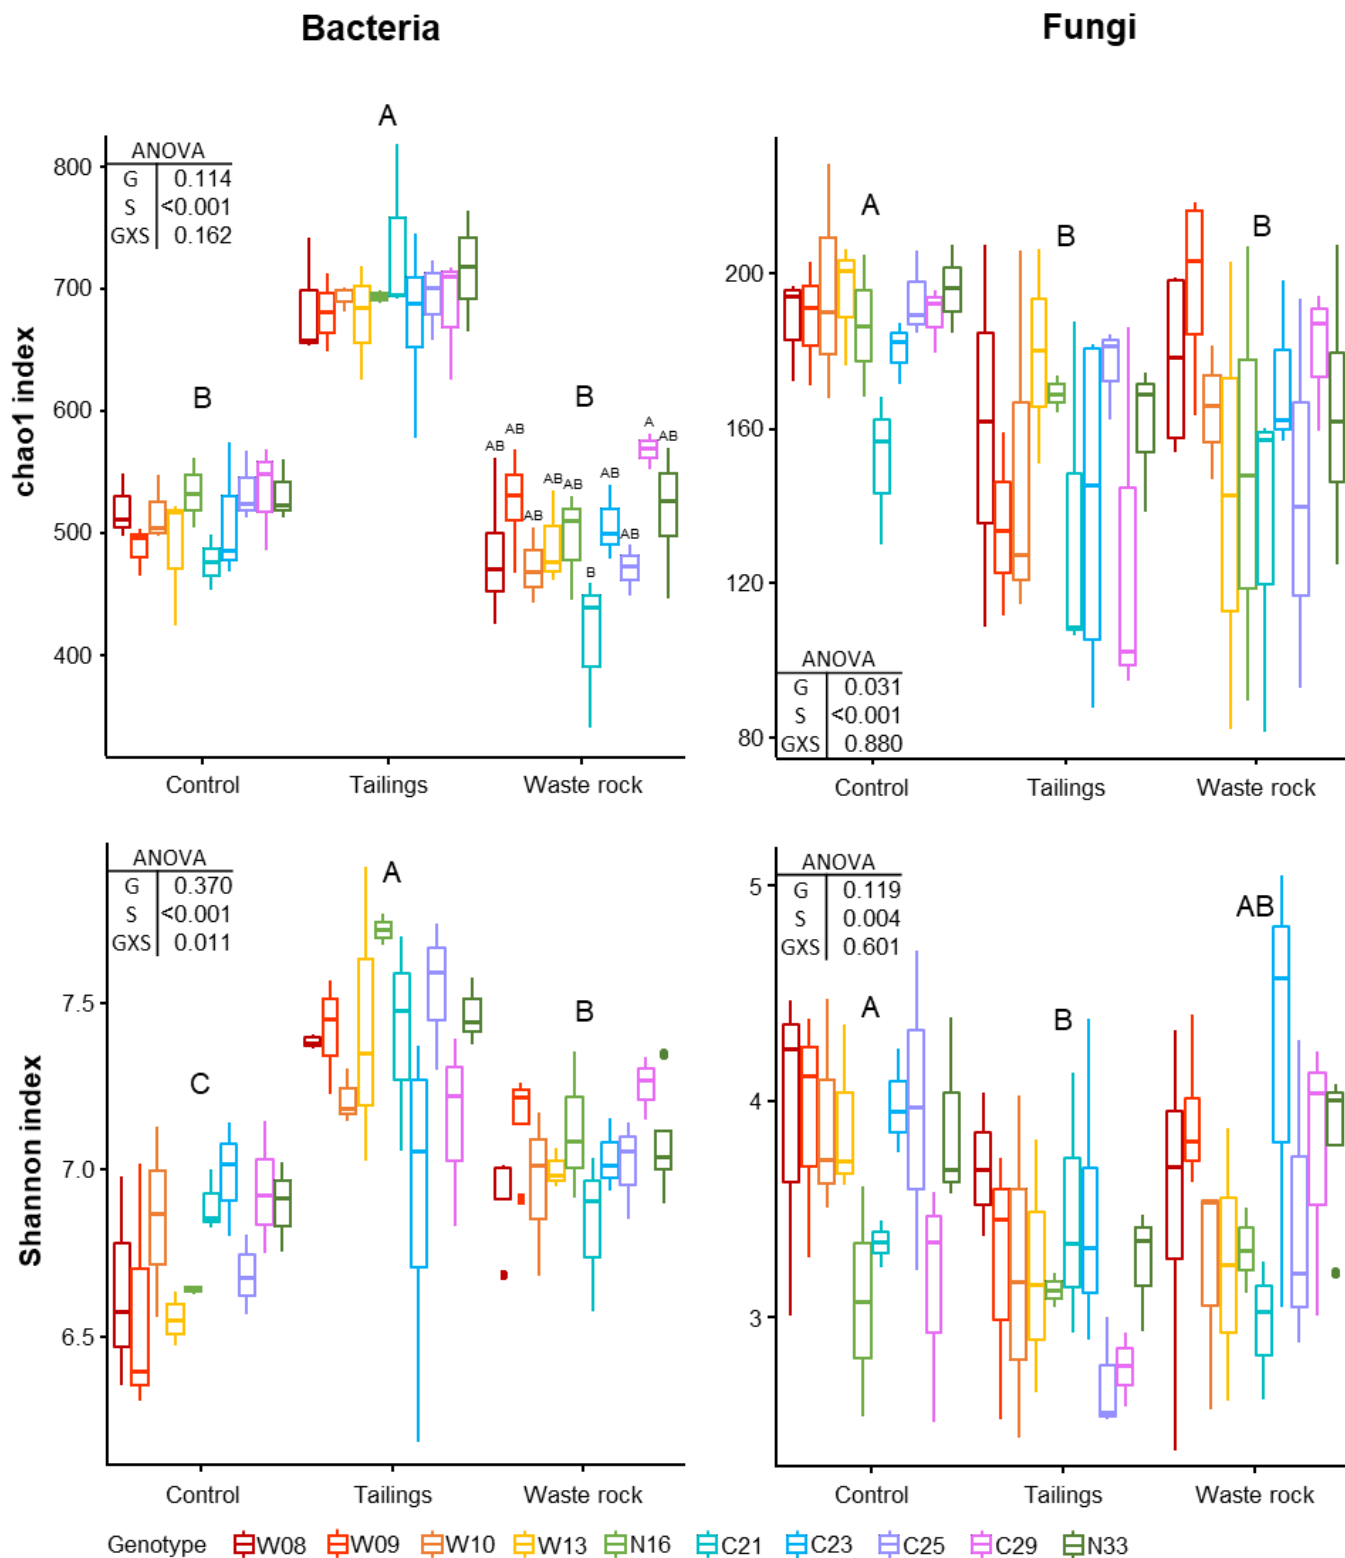

1080

1081

1082

1083 **Figure 4.** Alpha diversity indices of bacterial and fungal community profiles in greenhouse samples.  
1084 A two-way ANOVA was used to discern how genotype, substrate type and their interaction  
1085 influenced alpha diversity indices. In the ANOVA table, G is genotype; S is substrate type; and GXS  
1086 is the interaction between genotype and substrate type. Shared letters between treatments means there  
1087 is no significant difference between these treatments, as determined by Tukey HSD post-hoc pairwise  
1088 comparison test ( $n \geq 3$ ). Significance level is  $p < 0.05$ . Genotype had a significant effect on bacterial  
1089 richness in waste rock only (chao1 index;  $p = 0.040$ ).

1090

## Tree Genotype Impacts Rhizosphere Microbiomes

1091

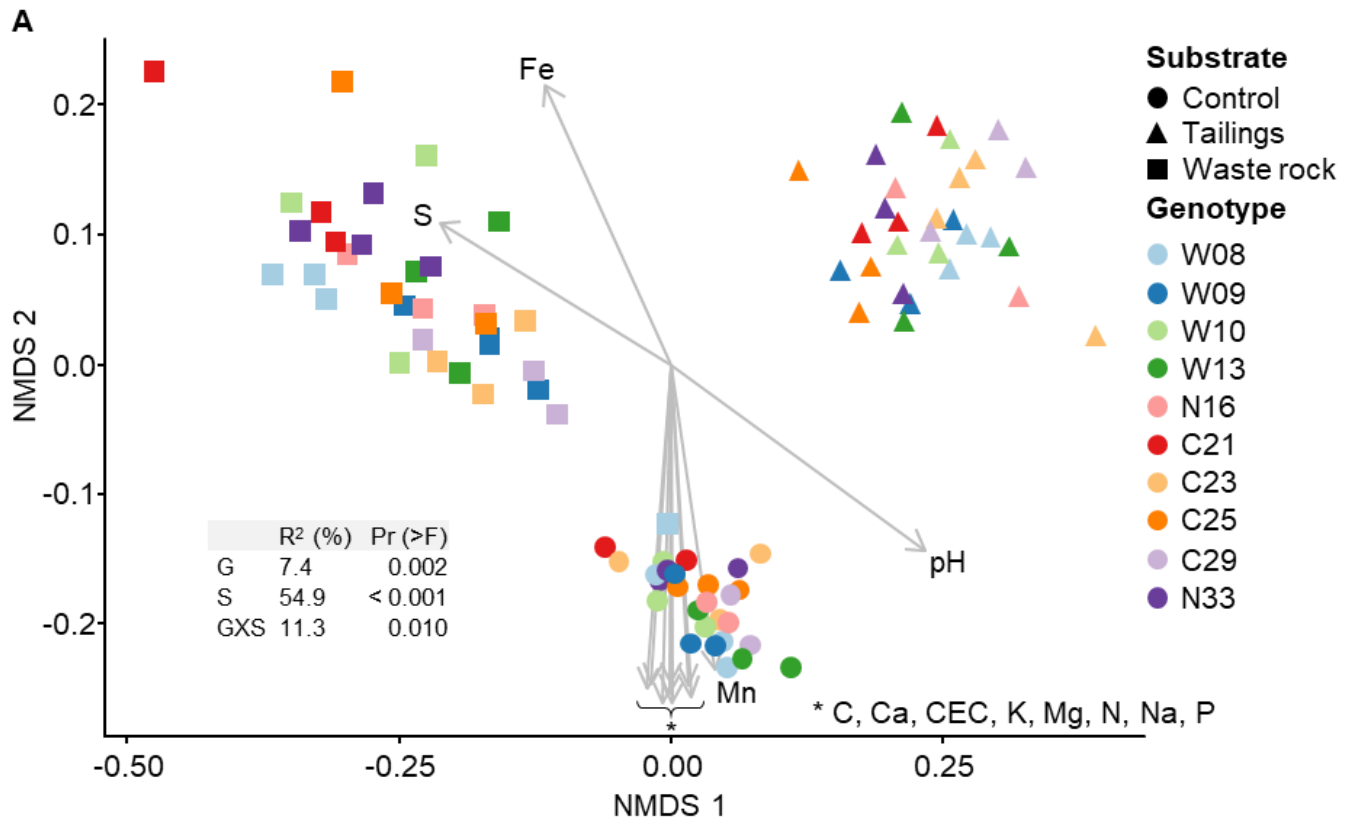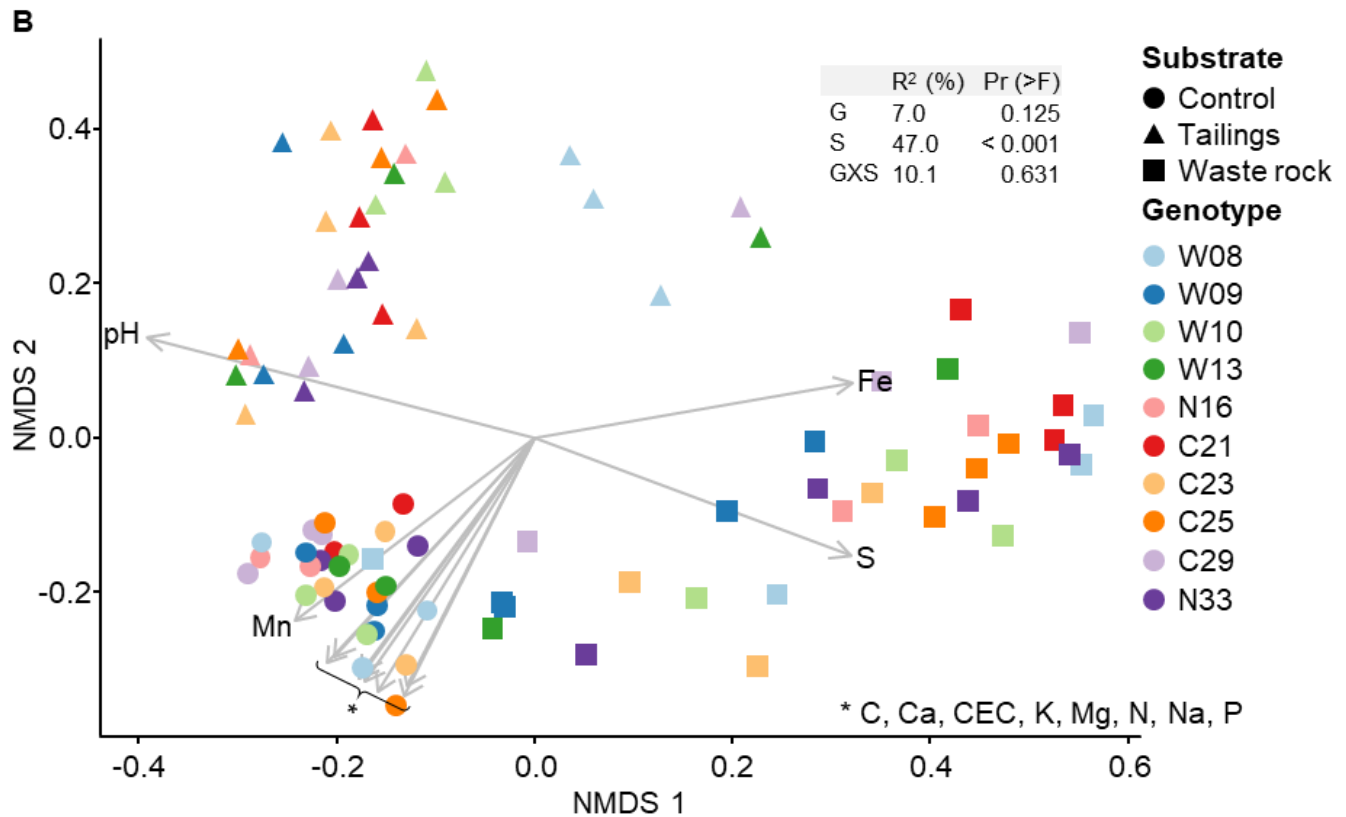



1092 **Figure 5.** Non-metric multidimensional scaling (NMDS) ordination of variation in bacterial and  
1093 fungal community structure of balsam poplar rhizosphere in the greenhouse experiment. Bacterial  
1094 community (**A**) and fungal community (**B**). Points represent samples and arrows represent the  
1095 significant ( $p < 0.001$ ) correlations between NMDS axes and the physicochemical properties of the  
1096 substrates. In PERMANOVA tables, G is for genotype; S for substrate type and GXS for the  
1097 interaction between genotype and substrate type. The model explains 73.6% and 64.1% of the  
1098 variation in bacterial and fungal community structure, respectively ( $n \geq 3$ ).

1099

## Tree Genotype Impacts Rhizosphere Microbiomes

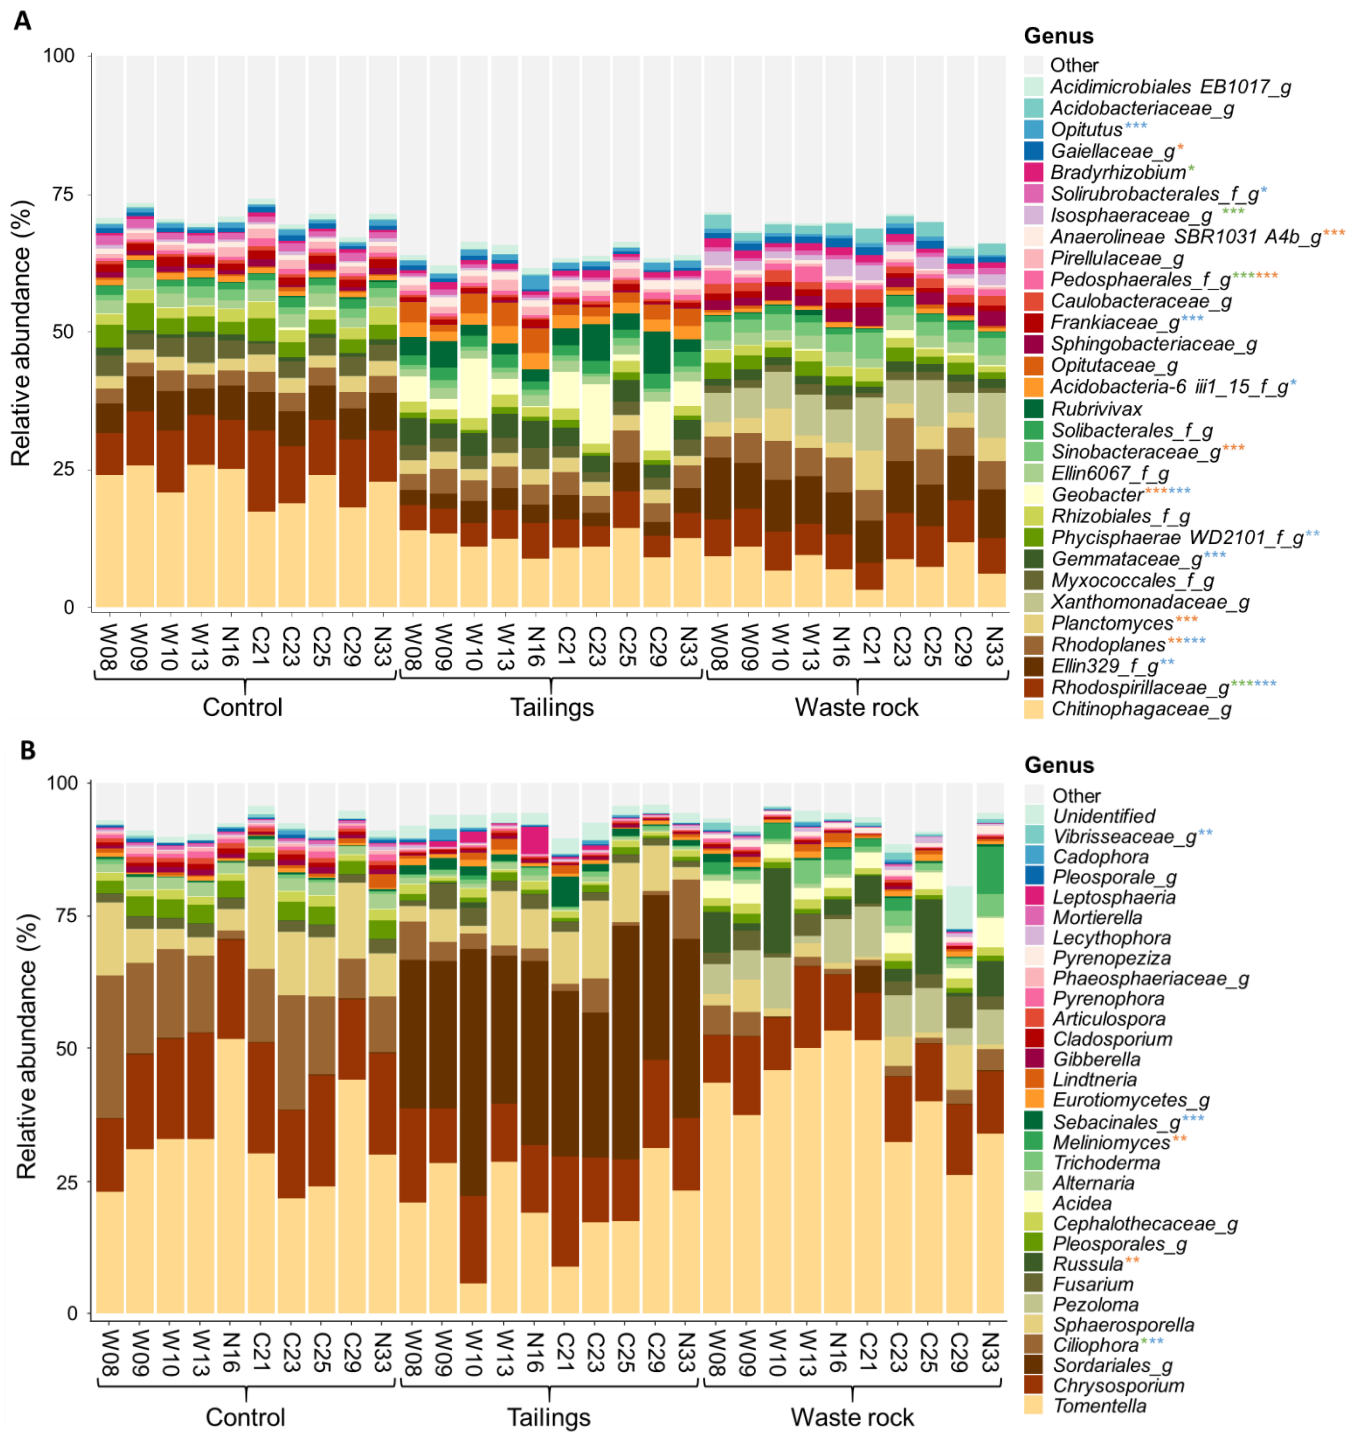

1100

1101 **Figure 6.** Taxonomic profiles of bacterial and fungal communities in treatments from the greenhouse  
 1102 experiment. Bacterial (A) and fungal (B) communities at the genus level. Only bacterial and fungal  
 1103 taxa with a relative abundance >1% in at least one treatment are shown. Replicates for each genotype  
 1104 were pooled for visual simplification (n ≥ 3). Stars represent levels of significant difference between  
 1105 genotypes in the three substrates analyzed separately: green for control, blue for tailings and orange  
 1106 for waste rock. Significant differences were determined by a Tukey HSD post-hoc pairwise  
 1107 comparison test. Significance level is represented as follows:  $p < 0.001$  \*\*\*,  $p < 0.01$  \*\*,  $p < 0.05$  \*.
